1 Title: Comparative genomics support reduced-genome *Paraburkholderia* symbionts of  
2 *Dictyostelium discoideum* amoebas are ancestrally adapted professional symbionts

3  
4 Suegene Noh<sup>1\*</sup>, Benjamin J. Capodanno<sup>1,2</sup>, Songtao Xu<sup>1</sup>, Marisa C. Hamilton<sup>1,3</sup>, Joan E.  
5 Strassmann<sup>4</sup>, David C. Queller<sup>4</sup>

6  
7 <sup>1</sup> Department of Biology, Colby College, Waterville, Maine, USA

8 <sup>2</sup> Brotman Baty Institute for Precision Medicine, Seattle, Washington, USA

9 <sup>3</sup> University Program in Genetics and Genomics, Duke University, Durham, North Carolina, USA

10 <sup>4</sup> Department of Biology, Washington University in St. Louis, St. Louis, Missouri, USA

11

12 Abstract

13 The social amoeba *Dictyostelium discoideum* is a predatory soil protist frequently used for  
14 studying host-pathogen interactions. A subset of *D. discoideum* strains isolated from soil  
15 persistently carry symbiotic *Paraburkholderia*, recently formally described as *P. agricolaris*, *P.*  
16 *bonniea*, and *P. hayleyella*. The three facultative symbiont species of *D. discoideum* present a  
17 unique opportunity to study a naturally occurring symbiosis in a laboratory model protist. In  
18 addition, there is a large difference in genome size between *P. agricolaris* (8.7 million base  
19 pairs) vs. *P. hayleyella* and *P. bonniea* (4.1 Mbp) and in GC content (62% vs. 59%). We took a  
20 comparative genomics approach and compared the three genomes of *D. discoideum*-symbionts  
21 to 12 additional *Paraburkholderia* genomes to test for genome evolution patterns that frequently  
22 accompany host adaptation. Overall, *P. agricolaris* is difficult to distinguish from other  
23 *Paraburkholderia* based on its genome size and content, but the two reduced genomes of *P.*  
24 *bonniea* and *P. hayleyella* display characteristics that support evolution in a host environment.  
25 In addition, all three *D. discoideum*-symbiont genomes have increased secretion system and  
26 motility genes that may mediate interactions with their host. Specifically, adjacent BurBor-like

27 type 3 and T6SS-5-like type 6 secretion system operons shared among all three *D. discoideum*-  
28 symbiont genomes may be important for host interaction. Ultimately, our combined evidence  
29 supports that the reduced-genome *D. discoideum*-symbionts have evolved to be professional  
30 symbionts ancestrally adapted to their protist hosts.

31

## 32 **Introduction**

33 The social amoeba *Dictyostelium discoideum* (Eumycetozoa; Dictyosteliales) is a predatory soil  
34 protist frequently used for studying host-pathogen interactions (Cosson & Soldati 2008; Bozzaro  
35 & Eichinger 2011; Dunn et al. 2017). It is also an emerging model for host-microbe symbiosis in  
36 the broad sense, which we define here as an intimate association between a eukaryotic host  
37 and a prokaryote symbiont that can result in positive, neutral, or negative fitness consequences  
38 in both parties involved (Tipton et al. 2019; Hentschel 2021; Drew et al. 2021). A subset of *D.*  
39 *discoideum* strains isolated from soil persistently carry intracellular gram-negative  
40 *Paraburkholderia* (Betaproteobacteria; Burkholderiales) (Brock et al. 2011; DiSalvo et al. 2015;  
41 Haselkorn et al. 2019). Multi-locus sequence typing analyses and whole genome phylogenies  
42 showed that these symbionts comprise 2 independent clades (Haselkorn et al. 2019; Brock et  
43 al. 2020). Subsequently, *P. agricolaris*, and the two sister species *P. bonniea*, and *P. hayleyella*  
44 were formally described as new species sufficiently different from any other previously  
45 described *Paraburkholderia* using genetic and phenotypic evidence (Brock et al. 2020).

46 The three *Paraburkholderia* symbionts of *D. discoideum* present a unique opportunity to  
47 study a naturally occurring symbiosis in a laboratory model protist. They additionally present  
48 opportunities for insight into the diversity of protist-prokaryote symbioses, which are  
49 understudied compared to the symbiotic relationships of multicellular eukaryotes and their  
50 microbial symbionts (Husnik et al. 2021). The association between *D. discoideum* and its  
51 *Paraburkholderia* symbionts appears to be facultative. *D. discoideum*-symbionts are able to  
52 simultaneously maintain a free-living and host-associated lifestyle (Haselkorn et al. 2019;

53 DiSalvo et al. 2015). The fitness outcomes to host and symbiont appear to be context-  
54 dependent (Scott et al. in press), as with most facultative host-microbe symbioses (Drew et al.  
55 2021). *D. discoideum* amoeba hosts generally suffer negative fitness consequences of  
56 association. When amoeba are infected with their *Paraburkholderia* symbionts in the lab, the  
57 hosts tend to eat less food bacteria during vegetative growth, migrate shorter distances as slugs  
58 during their multicellular social cycle, form shorter and smaller volume fruiting bodies, produce  
59 fewer spores, and carry other bacteria alive (secondary carriage) into their next vegetative  
60 growth cycle (Brock et al. 2011; DiSalvo et al. 2015; Shu, Brock, et al. 2018; Miller et al. 2020).  
61 However potentially important context-dependent fitness benefits to the host may be (1)  
62 increased availability of food bacteria in relatively inhospitable environments as a result of  
63 secondary carriage, and (2) improved competitive ability against other *D. discoideum* strains by  
64 potentially passing on symbiont infections or releasing *Paraburkholderia* secretions in a  
65 defensive manner (Brock et al. 2011, 2013). We know less about fitness outcomes of  
66 association for *Paraburkholderia* symbionts but *P. hayleyella* (though not *P. agricolaris*) reaches  
67 higher population densities in the presence of *D. discoideum* compared to on its own in soil  
68 medium (Garcia et al. 2019). While not a direct demonstration of any fitness benefits, *P.*  
69 *agricolaris* and *P. hayleyella* show positive chemotaxis toward *D. discoideum* supernatant (Shu,  
70 Zhang, et al. 2018).

71 We present a comparative genomics analysis of the three type strains of  
72 *Paraburkholderia* isolated from *D. discoideum* (*P. agricolaris* – BaQS159, *P. hayleyella* –  
73 BhQS11, and *P. bonniea* - BbQS859). We isolated all three strains from *D. discoideum* hosts  
74 collected at Mountain Lake Biological Station in Virginia, USA. Notably, there is a large  
75 difference in genome size between *P. agricolaris* (8.7 million base pairs) vs. *P. hayleyella* and *P.*  
76 *bonniea* (4.1 Mbp) and in GC content (62% vs. 59%) (Brock et al. 2020; Haselkorn et al. 2019).  
77 Genome reduction is a pattern associated with long-term host association in many symbiotic  
78 bacteria (Moran & Plague 2004; Moran 2002; Maurelli 2007; Bliven & Maurelli 2012; Merhej et

79 al. 2013, 2009; Toft & Andersson 2010) including pathogenic *Burkholderia* (Nierman et al.  
80 2004). Therefore, we investigated any significant differences in genome characteristics in the  
81 genomes of *D. discoideum* symbionts, and particularly in the two reduced genomes of *P.*  
82 *hayleyella* and *P. bonniea*. Based on what we know from the best studied endosymbiont  
83 genomes of multicellular animals we look for patterns that frequently accompany host  
84 adaptation, such as fewer genes in functional categories related to metabolism, DNA repair, and  
85 gene regulation (McCutcheon & Moran 2012; Andersson & Kurland 1998).

86 Because the ability to infect *D. discoideum* appears to be a shared derived trait among  
87 *Paraburkholderia* symbionts of *D. discoideum*, we focus several analyses on shared  
88 orthologous genes across the three genomes in comparison with other *Paraburkholderia*. Given  
89 the estimated large phylogenetic distance between the two *D. discoideum*-symbiont clades  
90 (Brock et al. 2020; Haselkorn et al. 2019), we pay particular attention to shared horizontally  
91 transferred genetic elements. Horizontal gene transfer generally contributes to an increase in  
92 prokaryote genomic repertoires but is subject to evolutionary processes including selection and  
93 drift as with the rest of the genome (Abby & Daubin 2007; Arnold et al. 2022; Brockhurst et al.  
94 2019; Liu et al. 2004). In the context of symbiosis, key horizontally transferred genes can enable  
95 new symbiotic relationships (e.g. symbiosis islands) (Hacker & Carniel 2001). If host adaptation-  
96 induced genome reduction is ongoing, we expect symbiont genomes to show signs of instability  
97 in the form of excess nonfunctional horizontally transferred genetic elements (e.g. insertion  
98 sequence (IS) elements or pseudogenes) (Ochman & Davalos 2006). IS elements in particular  
99 connect the themes of genome reduction and horizontally transferred genetic elements. They  
100 often proliferate during earlier stages of host adaptation and enable genome rearrangements  
101 and deterioration (Losada et al. 2010; Manzano-Marín & Latorre 2016), eventually leading to the  
102 highly reduced genomes seen in obligate symbionts.

103

104 **Methods**

105 *Paraburkholderia* genome selection and gene prediction

106           Genome sequencing methods were described previously (Brock et al. 2020). Briefly, we  
107 prepared high-quality DNA from individual strains grown on SM/5 agar media using Qiagen  
108 Genomic tips (20/G). Two genomes (*P. agricolaris* and *P. bonniea*) were sequenced by the  
109 University of Washington PacBio Sequencing Services and *P. hayleyella* was sequenced by the  
110 Duke University Center for Genomic and Computational Biology, all on the PacBio SMRT II  
111 platform. Reads were assembled via HGAP versions 1.87 and 1.85 (Chin et al. 2013). After an  
112 initial round of annotation, we identified the chromosomal replication initiator *dnaA* sequence  
113 and *Initiator replication protein* in each assembly's contig and re-oriented each contig from these  
114 genes using Circlator (Hunt et al. 2015). We used SMRT analysis software Quiver to repolish  
115 each assembly (Chin et al. 2013).

116           We chose the following *Paraburkholderia* with finished genomes for more detailed  
117 comparison: *P. fungorum* strain ATCC BAA-463 (Coenye et al. 2001), originally isolated from  
118 the fungus *Phanerochaete chrysosporium* (Seigle-Murandi et al. 1996), *P. sprentiae* strain  
119 WSM5005 (De Meyer et al. 2013) isolated from root nodules of the domesticated legume  
120 *Lebeckia ambigua*, *P. terrae* strain DSM17804 (Yang et al. 2006) isolated from broad-leaved  
121 forest soil, and *P. xenovorans* strain LB400 (Goris et al. 2004) isolated from polychlorinated  
122 biphenyl-contaminated soil. We refer to these four as our representative *Paraburkholderia*  
123 genomes. For broader scale analyses of molecular evolution and comparative genomics, we  
124 used 8 additional *Paraburkholderia* genomes that span the clade that includes *P. agricolaris*, *P.*  
125 *hayleyella* and *P. bonniea*. We added 4 plant-associated species genomes (*P. megapolitana*  
126 LMG23650, *P. phenoliruptrix* BR3459a, *P. phymatum* STM815, *P. phytofirmans* PsJN) and 4  
127 free-living species genomes (*P. caledonica* PHRS4, *P. phenazinium* LMG2247, *P. sartisoli*  
128 LMG24000, and *P. terricola* mHS1) (Vandamme et al. 2007; Coenye et al. 2004; Vandamme et  
129 al. 2002; Sessitsch et al. 2005; Viallard et al. 1998; Vanlaere et al. 2008; Goris et al. 2002). All

130 genomes were downloaded from NCBI and considered complete (Table S1). With the exception  
131 of *P. sartisoli* and *P. phenazinium*, all selected genomes are also finished.

132 We re-annotated each genome with Prokka v1.14.6 (Seemann 2014) using the  
133 annotation file of *Burkholderia pseudomallei* strain K96243 (downloaded from Burkholderia  
134 Genome DB version 9.1) as a source of known proteins. Next, we found putative pseudogenes  
135 in each genome using Pseudofinder v1.0 (Syberg-Olsen et al. 2021) with DIAMOND v2.0.6.144  
136 (Buchfink et al. 2015) BLAST against the NCBI RefSeq non-redundant protein database  
137 (downloaded August 27, 2021) in Annotate mode. Genes predicted to be pseudogenes due to  
138 truncation (less than 65% of average length of similar genes by default) or fragmentation  
139 (adjacent predicted reading frames match the same known protein) were removed from further  
140 analysis.

141

#### 142 *Whole genome alignment*

143 The genome aligner progressiveMauve (Darling et al. 2010) identifies locally collinear  
144 blocks (LCBs), local alignments that occur in the same sequence order and orientation across  
145 multiple genomes. We used all 13 finished *Paraburkholderia* genomes (all genomes noted  
146 above except *P. sartisoli* and *P. phenazinium*) for the initial whole genome progressiveMauve  
147 alignment in Mauve v2015-02-25. Next we compared the positions and orientations of locally  
148 collinear blocks across our three *D. discoideum*-symbiont genomes and each of these against  
149 the four representative *Paraburkholderia* genomes to identify large scale synteny using hive  
150 plots (Krzywinski et al. 2012). We used ggraph v2.0.3 and igrph v1.2.11 in R v3.6.0 (R Core  
151 Team 2019) to generate the hive plots.

152

#### 153 *Horizontally transferred genetic element detection*

154 We used the ISFinder (Siguiet et al. 2006) webserver (accessed October 27, 2021) and  
155 its nucleotide BLAST to identify putative IS elements to test for their proliferation in each

156 genome. We identified the best hits by comparing overlapping hits by e-value and bit score. We  
157 retained hits that were at least 70% coverage of the IS element it matched in the database.

158 Genomic islands are clusters of genes of horizontally transferred origin and have been  
159 found in a range of sizes from as small as 5 to as large as 500 kilobases (Dobrindt et al. 2004;  
160 Langille et al. 2010; Bertelli et al. 2019). We applied IslandPath-DIMOB and SIGI-HMM as  
161 implemented via the IslandViewer 4 webserver (Bertelli et al. 2017). IslandPath-DIMOB uses  
162 sequence composition and mobility genes, while SIGI-HMM uses codon usage bias. We then  
163 used pairwise reciprocal megablast to determine whether any of the predicted genomic islands  
164 were shared among *D. discoideum*-symbiont genomes.

165 Lastly, we looked for individually occurring horizontally transferred genes using  
166 DarkHorse2 v2.0\_rev09. DarkHorse2 compares individual genes against the NCBI NR database  
167 and detects genes with unusual distributions of hits by calculating a lineage probability index  
168 (LPI) score (Podell & Gaasterland 2007; Delaye et al. 2020). Vertically inherited genes will have  
169 a high LPI score because most high-scoring BLASTP hits will belong to close taxonomic  
170 relatives. Horizontally transferred genes are detected because high-scoring BLASTP hits will be  
171 taxonomically distant, leading to lower LPI scores. We used DIAMOND to perform BLASTP,  
172 then following suggestions from the author excluded self and sister species hits (*P. fungorum* for  
173 *P. agriculturalis*, *P. bonniea* and *P. hayleyella* from each other), and set the global filter threshold  
174 to 0.02 to allow candidate matches to have bit scores up to 2% different from the best non-self  
175 match.

176

### 177 *Gene functional annotation*

178 We performed broad scale functional annotation with COG (Clusters of Orthologous  
179 Groups) (Galperin et al. 2015; Tatusov et al. 2000), and KO (Kyoto Encyclopedia of Genes and  
180 Genomes (KEGG) Orthology) (Kanehisa, Sato, Kawashima, et al. 2016; Kanehisa et al. 2017).  
181 We assigned COG by RPS-BLAST (Altschul et al. 1997) against COG position-specific scoring

182 matrices downloaded from the NCBI Conserved Domain Database (version July 31, 2019). We  
183 followed JGI MGAP v4 practices and used an e-value cutoff of 0.01 and query coverage of at  
184 least 70% to be considered a valid assignment (Huntemann et al. 2015). We assigned KO using  
185 the BlastKOALA webserver (<http://kegg.jp/blastkoala/>; accessed July 13-28, 2020) that  
186 performed BLASTP against the KEGG GENES database at the prokaryote Genus and  
187 eukaryote Family level (Kanehisa, Sato & Morishima 2016).

188 We compared functional genome composition in terms of numbers of genes observed in  
189 each COG category using agglomerative clustering and non-metric multidimensional scaling  
190 (NMDS). Both were implemented in R: agglomerative clustering using cluster v2.1.2, and NMDS  
191 using vegan v2.5-7. Both analyses support that the reduced genomes of *P. bonniea* and *P.*  
192 *hayleyella* comprise their own cluster while all other genomes clustered together. We compared  
193 genome statistics by cluster, including genome size, GC% (proportion of GC nucleotides in the  
194 genome), proportions of intact genes vs. pseudogenes. To determine which COG categories  
195 contribute to this difference, we used a binomial exactTest (McMurdie & Holmes 2014) using  
196 edgeR v3.26.8 (Robinson et al. 2010). Because the enrichment of functional categories of  
197 genes for the comparison of *P. bonniea* and *P. hayleyella* vs. other *Paraburkholderia* genomes  
198 may be due to maintenance of necessary genes despite genome size degradation, we looked at  
199 both normalized and raw count comparisons. For each COG category that was significantly  
200 differently detected between the two clusters both in the relative (post-normalization) and  
201 absolute (raw counts) sense, we investigated which specific COGs were contributing to the  
202 difference. We used KEGG Mapper (Kanehisa & Sato 2020) and its Reconstruct Pathway tool  
203 ([https://www.genome.jp/kegg/tool/map\\_pathway.html](https://www.genome.jp/kegg/tool/map_pathway.html); accessed March 14, 2022) to corroborate  
204 differences in pathway components in genomes based on KO annotations.

205

206 *Core genome molecular evolution*



207 To determine orthologous genes shared among all examined genomes, we performed a  
208 pan-genome analysis using Roary v3.13.0 (Page et al. 2015) with a 70% identity threshold. To  
209 test hypotheses regarding changes in lineage-specific rates of molecular evolution in  
210 *Paraburkholderia* symbionts of *D. discoideum*, we used core genes detected in the Roary pan  
211 genome analysis. We used the whole genome species tree from Brock et al (2020) and dropped  
212 any additional taxa using the drop.tip() function in phytools v1.0-1 in R. This species tree was  
213 used throughout the subsequent molecular evolution analyses using PAML v4.9d (Yang 2007).  
214 Protein sequence multi-fasta files for each core gene were aligned with MUSCLE v3.8.31  
215 (Edgar 2004), then converted into codon alignments using PAL2NAL v14 (Suyama et al. 2006).  
216 We ran a series of codeml analyses on each codon alignment with proportional branch lengths  
217 as recommended by the PAML manual.

218 We applied three alternative hypotheses that test whether patterns of molecular  
219 evolution were altered by a symbiotic lifestyle (“symbiotic”), association specifically with *D.*  
220 *discoideum* (“dicty”), or in the reduced genomes of *P. bonniea* and *P. hayleyella* (“reduced”)  
221 (Table S1). We compared each of their AIC scores to that of the null hypothesis (H0) that there  
222 should be no significant variation in molecular evolution across the species tree. The hypothesis  
223 with the smallest AIC score with at least a 1 point difference from the null hypothesis was  
224 considered the best fit. For genes that showed patterns of molecular evolution that best fit an  
225 alternative hypothesis, we used Wilcoxon signed-rank tests in R to compare estimates of omega  
226 (dN/dS) between groups of species.

227

#### 228 *Essential amino acid biosynthetic repertoire*

229 We used GapMind webserver (<http://papers.genomics.lbl.gov/cgi-bin/gapView.cgi>;  
230 accessed January 26, 2022) to evaluate any loss of essential amino acid biosynthesis pathways  
231 in each genome. GapMind detects genes involved in biosynthesis of 17 amino acids (all  
232 standard amino acids excluding alanine, aspartate, and glutamate) and chorismate based on

233 MetaCyc pathways using a combination of sequence similarity and protein family profiles (Price  
234 et al. 2020, 2018). It can handle fusion proteins (two enzymes fused into a single protein) and  
235 split proteins (multi-domain enzyme split into up to two proteins).

236

### 237 *Protein secretion system repertoire and effector prediction*

238 We used TXSScan (Abby et al. 2016) implemented in Galaxy/ Pasteur (accessed  
239 October 2, 2020) to identify protein secretion systems in the three focal and 12 additional  
240 *Paraburkholderia* genomes. TXSScan identifies protein secretion systems (Types I-VI and IX,  
241 including Type IV and Tight adherence (Tad) pili) and flagella based on 204 experimentally  
242 studied protein profiles. It also determines whether a secretion system is complete by the  
243 presence of mandatory and forbidden component genes by sub-type, and whether it is  
244 contained within a single operon (single locus) or across a few neighboring operons (multi  
245 locus). We used the genomes of *Burkholderia mallei* ATCC 23344 and *Burkholderia*  
246 *pseudomallei* K96243 here to serve as ground truth because their secretion systems are well  
247 studied. A small number of T6SS and one T3SS were classified as incomplete due to  
248 misidentifying secretion system component homologs (e.g. TssC as IgIB). These were manually  
249 corrected and included in the analyses. We verified these manually corrected operons against  
250 secretion system databases and Burkholderia Genome DB v9.1 (Winsor et al. 2008).

251 We classified all T3SS and T6SS found in our 15 genomes. For T3SS, we used the  
252 T3Enc database v1.0 (Hu et al. 2017) and downloaded three representative amino acid  
253 sequences of thirteen categories of T3SS for the conserved component genes sctJ (inner  
254 membrane ring; IPR003282), sctN (ATPase; IPR005714), and sctV (export apparatus;  
255 IPR006302). We aligned protein sequences of each component gene using MUSCLE v3.8.31  
256 (Edgar 2004) and made gene trees using the Le and Gascuel substitution model with FastTree  
257 v2.1.10 (Price et al. 2010). We estimated a species tree from these gene trees using ASTRID  
258 v2.2.1 (Vachaspati & Warnow 2015) and ASTRAL v5.7.8 (Zhang et al. 2018). We followed the

259 same methods for T6SS using the SecReT6 database v3.0 (Li et al. 2015) and the conserved  
260 component genes *tssB* (sheath; COG3516), *tssC* (sheath; COG3517), and *tssF* (baseplate;  
261 COG3519).

262 We used VFDB (Virulence factors of Pathogenic Bacteria; accessed January 25, 2022)  
263 (Chen et al. 2005) and downloaded protein sequences of known *Bordatella* T3 Secreted  
264 Effectors and *Burkholderia* T3 and T6 Secreted Effectors. We used DIAMOND BLASTP and  
265 these proteins as query sequences against the predicted amino acid sequences of each  
266 genome. We also used the webserver BastionHub (accessed April 20, 2021) to predict secreted  
267 effectors. BastionHub (Wang et al. 2021) combines a hidden Markov model based approach  
268 and a machine learning approach. Lastly, we used effectiveELD (Jehl et al. 2011; Eichinger et  
269 al. 2016) on the effectiveDB server (accessed March 28, 2022) to find putative secreted proteins  
270 that contain a eukaryotic-like domain. We specifically looked for proteins with domains that  
271 belong to Pfam clans for Ank (ankyrin), TPR (tetratricopeptide repeat), LRR (leucine-rich  
272 repeat), Pentapeptide, F-box, and RING (including U-box). These domains were selected based  
273 on previous reports regarding large numbers of proteins containing eukaryotic domains among  
274 amoeba symbionts (Schmitz-Esser et al. 2010; Gomez-Valero & Buchrieser 2019; Schulz et al.  
275 2016). InterProScan (Jones et al. 2014) webserver (accessed March 29, 2022) was used for  
276 additional investigation of secreted effector candidates.

277

### 278 *Paraburkholderia* Genome Browser

279 We built a web Genome Browser for each *D. discoideum*-symbiont genome for convenient  
280 browsing of all annotated genomic features mentioned above. We used JBrowse v1 (Buels et al.  
281 2016; Skinner et al. 2009). The front-end web application was developed in Centos Steam 8  
282 version of Linux. We used NGINX Web Server v1.14.1 and Java OpenJDK v1.8.0\_322. The  
283 browser is available at <https://burk.colby.edu> (it is currently behind a login while we build out its  
284 firewall so please contact S. Noh for access). The GitHub repositories supporting the browser

285 are available at <https://github.com/noh-lab/burk-browser> and <https://github.com/noh-lab/jbrowse->  
286 executables.

287

## 288 *Data and Code Availability*

289 All analyses and figures found in this manuscript can be generated and recreated using input  
290 data and code available at the GitHub repository <https://github.com/noh-lab/comparative-dicty->  
291 symbionts.

292

## 293 **Results and Discussion**

294 *D. discoideum*-symbionts represent two distinct categories, reduced vs. non-reduced size  
295 genomes

296 Sequencing using PacBio technology indicated that the genomes of all three *D.*  
297 *discoideum*-symbiont species are each comprised of 2 chromosomes, albeit resulting in  
298 different total genome sizes. The *P. agricolaris* genome was more than twice the size of both *P.*  
299 *bonniea* and *P. hayleyella* (8.7 vs. 4.1 million base pairs). The overall gene content (CDS)  
300 comparison was also proportionate, with approximately 7700 genes predicted for *P. agricolaris*  
301 as opposed to approximately 3600 genes for the reduced genomes (Table 1). The genome size  
302 and gene count of *P. agricolaris* is on par with other the *Paraburkholderia* genomes we  
303 examined (Table 1).

304

305 Table 1. Genome statistics of *Paraburkholderia* symbionts of *D. discoideum* and other  
306 representative *Paraburkholderia* strains for comparison

|                             | <b><i>P. agricolaris</i></b><br><b>BaQS159</b> | <b><i>P. bonniea</i></b><br><b>BbQS859</b> | <b><i>P. hayleyella</i></b><br><b>BhQS11</b> |
|-----------------------------|------------------------------------------------|--------------------------------------------|----------------------------------------------|
| Scaffold count              | 2                                              | 2                                          | 2                                            |
| Genome size<br>(chr1, chr2) | 8,721,420<br>(4,816,966,<br>3,904,454)         | 4,098,182<br>(3,175,376,<br>922,806)       | 4,125,700<br>(3,295,139,<br>830,561)         |

|                  |                                       |                                       |                                       |
|------------------|---------------------------------------|---------------------------------------|---------------------------------------|
| GC content (%)   | 61.6                                  | 58.7                                  | 59.2                                  |
| Genes (total)    | 7,811                                 | 3,600                                 | 3,686                                 |
| CDS (total)      | 7,721                                 | 3,531                                 | 3,610                                 |
| Pseudogene count | 579                                   | 265                                   | 315                                   |
| rRNA             | 18                                    | 12                                    | 12                                    |
| tRNA             | 71                                    | 56                                    | 63                                    |
| Locality (host)  | <i>D. discoideum</i> in Virginia, USA | <i>D. discoideum</i> in Virginia, USA | <i>D. discoideum</i> in Virginia, USA |

307

|                     | <i>P. fungorum</i><br>ATCC BAA-463                            | <i>P. sprentiae</i><br>WSM5005                                   | <i>P. terrae</i> DSM<br>17804           | <i>P. xenovorans</i><br>LB400 |
|---------------------|---------------------------------------------------------------|------------------------------------------------------------------|-----------------------------------------|-------------------------------|
| Scaffold count      | 4                                                             | 5                                                                | 4                                       | 3                             |
| Genome size (total) | 9,058,983                                                     | 7,829,542                                                        | 10,062,489                              | 9,702,951                     |
| GC content          | 61.8                                                          | 63.2                                                             | 61.9                                    | 62.6                          |
| Genes (total)       | 8,260                                                         | 7,185                                                            | 9,045                                   | 8,760                         |
| CDS (total)         | 8,174                                                         | 7,087                                                            | 8,957                                   | 8,675                         |
| Pseudogene count    | 746                                                           | 857                                                              | 803                                     | 845                           |
| rRNA count          | 18                                                            | 21                                                               | 18                                      | 18                            |
| tRNA count          | 67                                                            | 76                                                               | 69                                      | 66                            |
| Locality (host)     | White-rot fungus <i>Phanerochaete chrysosporium</i> in Sweden | Domesticated legume <i>Lebeckia ambigua</i> in Western Australia | Broad-leaved forest soil in South Korea | PCB-contaminated soil in USA  |

308 \*Genes and CDS counts were predicted by Prokka and are inclusive of pseudogenes

309 \*Pseudogenes were predicted by Pseudofinder

310

311 Whole genome alignments of all ten finished genomes found 153 locally colinear blocks,  
 312 ranging in sizes as small as 262 base pairs and as large as 208,252 base pairs in the *P.*  
 313 *agricolaris* genome. *P. bonniea* and *P. hayleyella* share with each other considerable synteny  
 314 but also possess a large inverted region relative to each other (Figure 1). Both of these reduced  
 315 genomes show extensive genome rearrangement compared to the genome of *P. agricolaris*, or  
 316 any of the other *Paraburkholderia* genomes (Figure 1 & S1). The genome of *P. agricolaris*  
 317 shares a large degree of synteny with other *Paraburkholderia* genomes in chromosome 1 as  
 318 indicated by the overall lack of gaps toward the center of each hive plot (Figure S1).

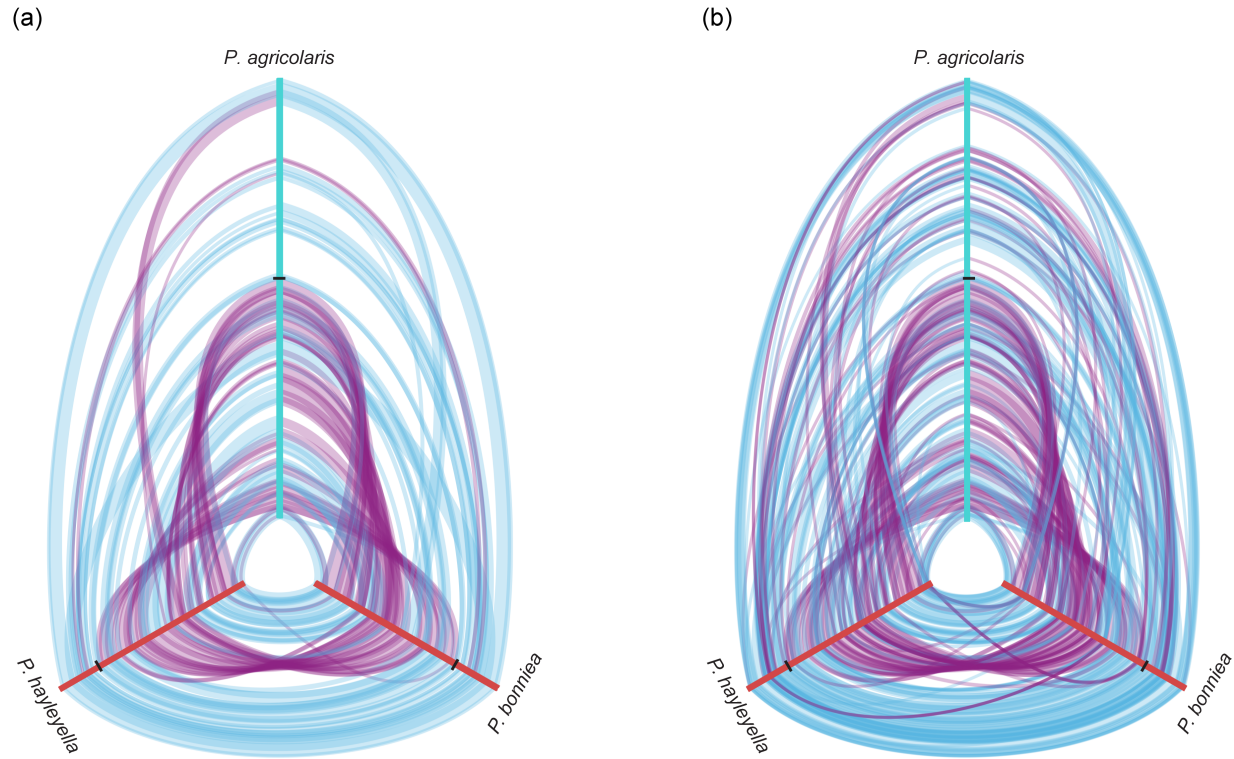

319

320 Figure 1. Hive plots of whole genome comparisons of *D. discoideum*-symbiont genomes.

321 Locally colinear blocks between pairs of genomes are shown as bands that connect the axes  
322 (genomes). Only blocks above the median size are shown on the left (a) for visual clarity, while  
323 all blocks are shown on the right (b). Alignment of locally colinear blocks are distinguished  
324 between forward (blue) and reverse (purple) orientation. Axes are oriented center out, and  
325 boundaries between chromosomes are shown as ticks.

326

327 We found few IS elements in the *D. discoideum*-symbiont genomes. *P. agricolaris* has  
328 the IS elements IS1090 (6 copies) and ISBmu21 (1 copy), *P. bonniea* has ISBp1 (2 copies) and  
329 ISBuph1 (3 copies), and *P. hayleyella* has a single ISPa37 in their genomes (Table S2). Among  
330 the other *Paraburkholderia* genomes we examined, the highest number of IS elements was  
331 found in *P. xenovorans* LB400 (62 total), while others possessed intermediate numbers ranging  
332 from 5 in *P. sprentiae* to 21 in *P. fungorum*. For reference, genomes of *B. mallei* possess  
333 between 166-218 IS elements, many of which were flanking regions that were randomly lost

334 among the examined strains in what appears to be ongoing genome reduction (Losada et al.  
335 2010). There was also no evidence of excess pseudogenes in the reduced genomes relative to  
336 other *Paraburkholderia* genomes (Table 1). Double-strand break repair pathways (KEGG  
337 map03440) were complete in all three *D. discoideum*-symbiont genomes. As genomes with  
338 ongoing genome reduction often have numerous IS elements and pseudogenes, and  
339 incomplete double-strand break repair pathways, the combined evidence supports that all three  
340 *D. discoideum*-symbiont genomes are relatively stable, and the two reduced genomes are  
341 currently not in flux.

342

343 *The reduced D. discoideum-symbiont genomes show evidence of functional adaptation to the*  
344 *host environment*

345 For each *D. discoideum*-symbiont genome, 65-68 % of genes were annotated with COG  
346 (Figure S2), and 53-61 % with KO. The agglomerative clustering and NMDS analyses of COG  
347 category representation across genomes resulted in *P. bonniea* and *P. hayleyella* clustering  
348 with each other and apart from other *Paraburkholderia* including *P. agricolaris* (Figure 2).  
349 Further investigation of specific functional differences between the two groups (reduced  
350 genomes vs. non-reduced) indicated nine COG categories that were significantly different  
351 (exactTest, FDR << 0.01). Of these, four were consistently different in both normalized and raw  
352 counts in the same direction (Figure S3). Fewer genes than expected were detected in the  
353 reduced genomes of *P. bonniea* and *P. hayleyella* for Transcription (category K), Carbohydrate  
354 transport and metabolism (G), and Inorganic ion transport and metabolism (P). More genes than  
355 expected were found in the reduced genomes for Cell motility (N).

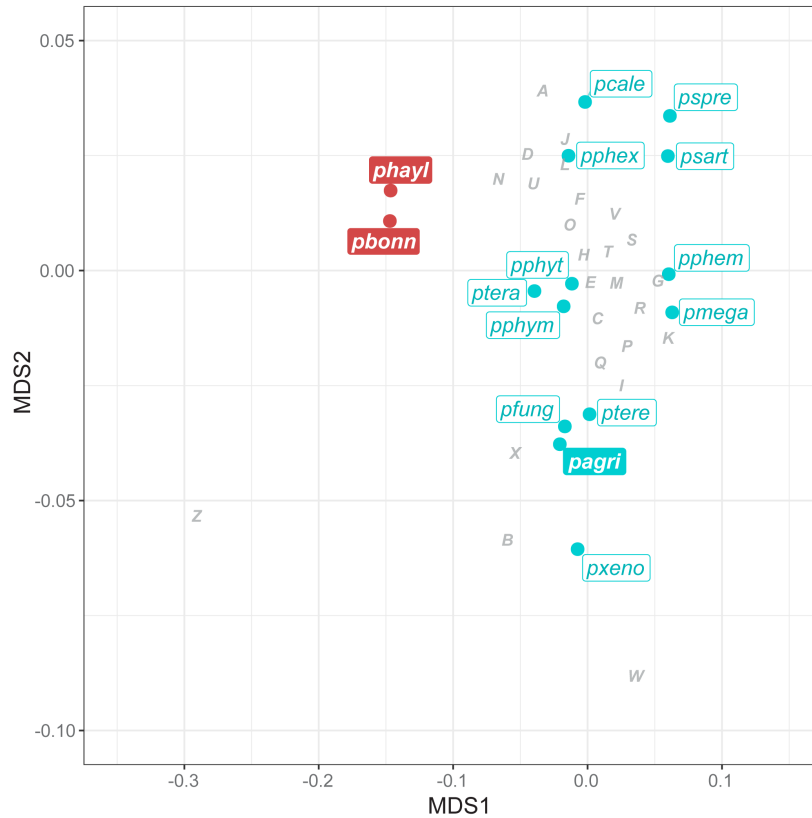

356

357 Figure 2. Comparison of reduced (red) and non-reduced (turquoise) genomes in terms of their  
358 functional compositions in nonmetric multidimensional space. The contributions of COG  
359 categories are projected with minor adjustments to avoid overlap with other features. (pagri = *P.*  
360 *agricolaris*; pbonn = *P. bonniea*; phayl = *P. hayleyella*; pcale = *P. caledonica*; pfung = *P.*  
361 *fungorum*, pmega = *P. megapolitana*, pphem = *P. phenazinium*; pphehex = *P. phenoliruptrix*;  
362 pphym = *P. phymatum*; pphyt = *P. phytofirmans*; psart = *P. sartisoli*; pspre = *P. sprentiae*; ptera  
363 = *P. terricola*; ptere = *P. terrae*; pxeno = *P. xenovorans*) (J = Translation, ribosomal structure  
364 and biogenesis; A = RNA processing and modification; K = Transcription; L = Replication,  
365 recombination and repair; B = Chromatin structure and dynamics; D = Cell cycle control, cell  
366 division, chromosome partitioning; Y = Nuclear structure; V = Defense mechanisms; T = Signal  
367 transduction mechanisms; M = Cell wall/ membrane/ envelope biogenesis; N = Cell motility; Z =  
368 Cytoskeleton; W = Extracellular structures; U = Intracellular trafficking, secretion, and vesicular  
369 transport O = Posttranslational modification, protein turnover, chaperones; X = Mobilome:



370 prophages, transposons; C = Energy production and conversion; G = Carbohydrate transport  
371 and metabolism; E = Amino acid transport and metabolism; F = Nucleotide transport and  
372 metabolism; H = Coenzyme transport and metabolism; I = Lipid transport and metabolism; P =  
373 Inorganic ion transport and metabolism; Q = Secondary metabolites biosynthesis, transport and  
374 catabolism; R = General function prediction only; S = Function unknown)

375

376 We looked within each COG category that was significantly different between reduced  
377 and non-reduced genomes in more detail. First, we found several flagella biosynthesis, basal  
378 body, and hook protein COGs that were more abundant in the reduced genomes than expected  
379 (Figure 3a). Flagella are often associated with bacterial virulence, not only through providing  
380 motility but also adhesion, invasion, and the secretion and regulation of virulence factors  
381 (Ottemann & Miller 1997; Duan et al. 2013). Among *Burkholderia*, *B. pseudomallei* flagella have  
382 been shown to be necessary for post-invasion virulence in mice (Chua et al. 2003). *B.*  
383 *pseudomallei* and *B. thailandensis* each have two flagellar clusters, and in *B. thailandensis* the  
384 second cryptic cluster is involved in post-invasion intracellular motility (French et al. 2011). We  
385 found a second flagellar cluster in *P. bonniea* but not in the other *D. discoideum*-symbiont  
386 genomes (see also 'Secretion systems' section).

387 The other significant COG categories were less abundant in the reduced genomes than  
388 expected (Figure 3bcd). Many families of transcriptional regulator COGs were less abundant in  
389 the reduced genomes, as is often seen with reduced symbiotic bacterial genomes (Merhej et al.  
390 2013; Wilcox et al. 2003). Similarly, several ATP binding cassette (ABC)-type sugar and metal  
391 ion transporter COGs were less abundant in the reduced genomes. ABC transporters are often  
392 reduced in number in bacteria with intracellular niches compared to extracellular or  
393 environmental ones, as intracellular environments are relatively more stable compared to  
394 extracellular environments (Garmory & Titball 2004; Harland et al. 2007).

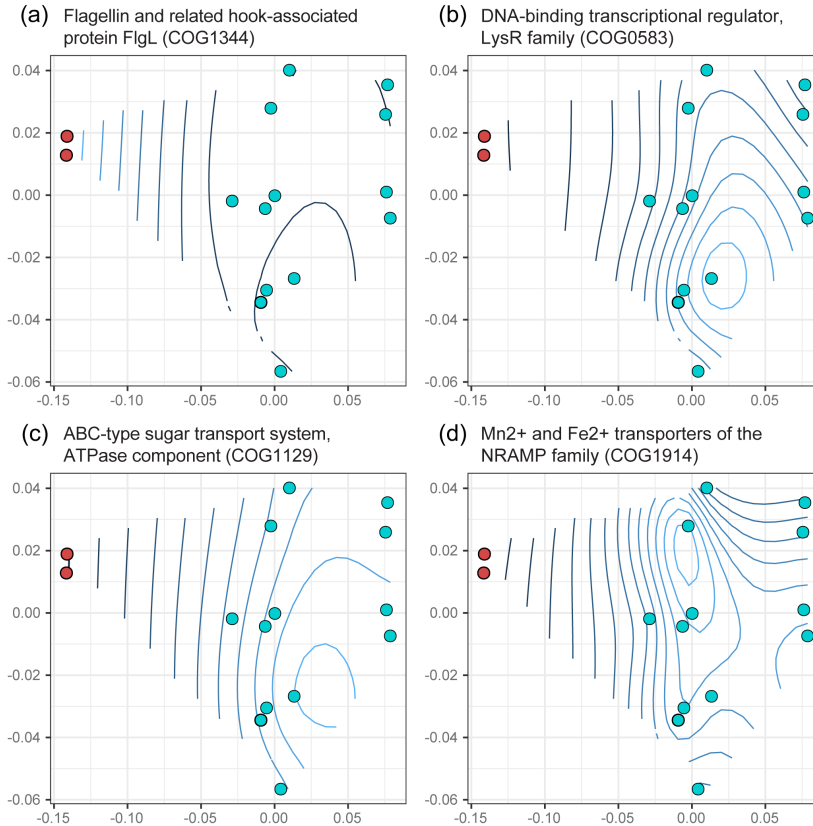

395

396

397 Figure 3. Representative individual COGs belonging to categories (a) Cell motility, (b)  
398 Transcription, (c) Carbohydrate transport and metabolism, and (d) Inorganic ion transport and  
399 metabolism (P) that were significantly overrepresented or underrepresented in the reduced  
400 genomes of *D. discoideum*-symbionts. Contours of abundances are superimposed on the  
401 nonmetric multidimensional space from Figure 2. *P. bonniea* and *P. hayleyella* are shown as red  
402 points to the left, while *P. agricolaris* is not distinguished from the other genomes in turquoise.  
403 Lighter blue contour lines indicate higher abundance compared to darker blue lines.

404

405 Analysis with KEGG mapper reconstruction confirmed several missing sugar transport  
406 systems in the reduced genomes compared to *P. agricolaris*, including Sorbitol/ Mannitol, L-  
407 Arabinose, Galactofuranose, D-Xylose, Fructose, and Rhamnose. Genes encoding iron (III)  
408 transporters were also absent in the two reduced symbiont genomes compared to non-reduced

409 *P. agriculturalis*. A similar analysis of ABC transporters also revealed the presence of heme  
410 exporter proteins in both reduced genomes but not in *P. agriculturalis*, and a capsular  
411 polysaccharide transport system in *P. bonniea* only. We also examined two-component system  
412 (TCS) transporters with KEGG mapper because pathogenic *Burkholderia* have multiple two-  
413 component systems related to virulence in plant and animal infection models (Schaefers 2020).  
414 Compared to *P. agriculturalis*, the reduced genomes lacked genes encoding nitrate reductase  
415 proteins and chemotaxis proteins typically involved in biofilm formation through cyclic di-GMP  
416 regulation. In free-living *B. pseudomallei* these two two-component systems are linked, as the  
417 presence of nitrate has been shown to reduce intracellular cyclic di-GMP levels and inhibit  
418 biofilm formation (Mangalea et al. 2017). It appears these two-component systems and the  
419 aforementioned transporters have not been maintained under selection during host adaptation  
420 and genome reduction in *P. bonniea* and *P. hayleyella*.

421  
422 *The reduced D. discoideum-symbiont genomes may experience a combination of stronger and*  
423 *relaxed purifying selection relative to other Paraburkholderia genomes*

424 We identified 1673 core genes shared by the 15 *Paraburkholderia* species genomes we  
425 investigated (Figure S2). When we examined dN/dS as a signature of molecular evolution, the  
426 majority of the *Paraburkholderia* core genes showed nonsignificant variation in selection  
427 pressure across the species phylogeny. However, a large proportion of core genes (~40 %)   
428 showed an alternative pattern of molecular evolution (Table 2). These genes show one of two  
429 patterns of molecular evolution: those that appear to experience increased selection pressure  
430 and significantly lower dN/dS once symbiotically associated with eukaryotes or specifically with  
431 *D. discoideum* (“symbiotic” and “dicty”; both Wilcoxon test  $P \ll 0.01$ ), and those that show  
432 evidence of relaxed selection and significantly higher dN/dS in genomes of reduced size  
433 (“reduced”; Wilcoxon test  $P \ll 0.01$ ) (Figure 4). These results indicate that the reduced  
434 genomes of *P. bonniea* and *P. hayleyella* possess a combination of genes experiencing

435 stronger selective constraints and genes under weaker selective constraints relative to the  
 436 genomes of other *Paraburkholderia*. This pattern is in contrast to genomes of obligate  
 437 symbionts where the majority of genes are experiencing genetic drift and weaker selection  
 438 constraints across their entire genomes (Sabater-Muñoz et al. 2017; Wernegreen 2017).

439

440 Table 2. Hypotheses tested regarding molecular evolution in the 1673 core genes shared

441 across 15 *Paraburkholderia* genomes.

| Hypothesis  | Number of core genes | Detailed description                                                                                                                 |
|-------------|----------------------|--------------------------------------------------------------------------------------------------------------------------------------|
| “null”      | 1001                 | Selection pressure does not vary across the tree                                                                                     |
| “symbiotic” | 163                  | Selection pressure is different when species are free-living vs. symbiotically associated with a eukaryotic host (2 rate ratios)     |
| “dicty”     | 137                  | Selection pressure is different when species are unassociated vs. symbiotically associated with <i>D. discoideum</i> (2 rate ratios) |
| “reduced”   | 372                  | Selection pressure is different in species with reduced genomes ( <i>P. bonniea</i> and <i>P. hayleyella</i> ) (2 rate ratios)       |

442

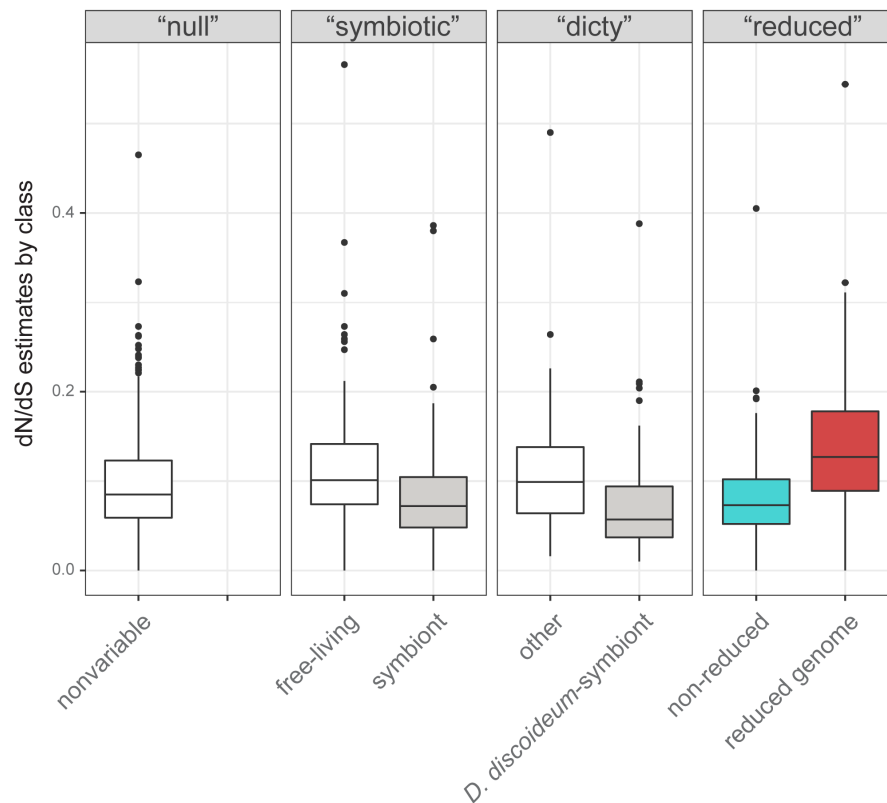

443

444 Figure 4. Core genes divided into the hypothesis that best predicts their patterns of molecular  
445 evolution. Core genes included genes evolving under stronger selective constraints with  
446 significantly lower dN/dS in genomes of symbionts of *D. discoideum* or other eukaryotes  
447 (“symbiotic” and “dicty”), and genes showing evidence of relaxed selective constraints with  
448 significantly higher dN/dS in the reduced genomes of *P. bonniea* and *P. hayleyella* (“reduced”).  
449

450 The three *D. discoideum*-symbiont genomes shared 1977 genes total, including the  
451 1673 core genes (Figure S2). Of the 1977 *D. discoideum*-symbiont-shared genes (inclusive of  
452 core genes), 120 were not orthologous to genes found in any of the other *Paraburkholderia*  
453 genomes we compared. These genes included type 3 and type 6 secretion system component  
454 genes (see ‘Secretion systems’ section), *bhuRSTUV* genes, and helix-turn-helix motif-  
455 containing GntR and LysR transcriptional regulators. *Bordatella* heme utilization (*bhu*) genes are  
456 virulence factors in mammalian and avian host infection (Murphy et al. 2002; Vanderpool &  
457 Armstrong 2001), and transcriptional regulators with helix-turn-helix motifs have been frequently  
458 associated with virulence in pathogens (Finlay & Falkow 1997).

459  
460 *The relationship between D. discoideum and its symbionts is unlikely to be based on amino acid*  
461 *exchange*

462 The gradual loss of essential amino acid biosynthetic ability is a feature of genome  
463 reduction in many microbial symbionts that have nutrient exchange relationships with their hosts  
464 (Moran et al. 2008; Lo et al. 2016; McCutcheon et al. 2019). However nutrient-dependent  
465 relationships are less likely in protist-prokaryote symbioses because protist host diets tend to be  
466 much more diverse compared to multicellular eukaryotes (Husnik et al. 2021). Accordingly, the  
467 three *D. discoideum*-symbiont species are predicted to synthesize all essential amino acids  
468 (Table S3), albeit with some variation in degrees of confidence. High confidence candidates  
469 were identified for each of the steps of amino acid biosynthesis in *P. agricolaris* but some

470 pathways included medium confidence steps in the other two species with reduced genomes. In  
471 *P. bonniea*, the L-arginine biosynthesis pathway contained one medium confidence enzyme  
472 (Ornithine carbamoyltransferase *argI*) that was a lower coverage match (78%) than the high  
473 confidence threshold (>80%). There is more evidence for a potential breakdown of essential  
474 amino acid synthesis in *P. hayleyella*. *P. hayleyella* had four potential gaps in its amino acid  
475 biosynthesis pathways. The L-isoleucine, L-leucine and L-valine pathways shared a single  
476 medium confidence enzyme candidate that is potentially a L-arabonate dehydratase rather than  
477 the necessary dihydroxy-acid dehydratase *ilvD* based on ublast bit scores. The L-tryptophan  
478 pathway had two medium confidence enzyme candidates for phosphoribosylanthranilate  
479 isomerase (*PRAI*), and the better scoring one was a lower coverage match (71%) than the high  
480 confidence threshold. However, given the degree of genome reduction that has already  
481 occurred in the reduced genome *D. discoideum*-symbionts, we consider it unlikely that the  
482 symbiotic relationship is based on amino acid exchange as essential amino acid synthesis  
483 pathways appear largely intact.

484

485 *D. discoideum*-symbiont genomes share few horizontally transferred genetic elements

486 We looked for evidence of shared horizontally transmitted genetic elements. We  
487 identified 38, 29, and 27 genomic islands in each *D. discoideum*-symbiont genome (*P.*  
488 *agricolaris*, *P. bonniea*, and *P. hayleyella*), but none of the predicted genomic islands were  
489 closely related to a genomic island in another *D. discoideum*-symbiont genome. We found 133,  
490 109, and 120 individually horizontally transferred genes in each *D. discoideum*-symbiont  
491 genome. One candidate was shared among all three genomes (type VI secretion system  
492 contractile sheath, large subunit) while two additional candidates were shared by *P. bonniea*  
493 and *P. hayleyella* (PIN family putative toxin-antitoxin system, toxin component; class I SAM-  
494 dependent methyltransferase). The scarcity of easily-identified shared horizontally transferred  
495 genetic elements suggest it is unlikely that a recent horizontal gene transfer event substantially

496 contributed to the shared ability of these symbionts to persistently infect *D. discoideum*. If such  
497 an event had occurred, any such genes seem to have experienced amelioration over  
498 evolutionary time and cannot easily be distinguished from the rest of the genome (Lawrence &  
499 Ochman 1997).

500

501 *Shared secretion systems may mediate D. discoideum-Paraburkholderia symbiont interactions*

502 Bacterial secretion systems are frequently implicated in host-symbiont interactions

503 (Tseng et al. 2009; Coombes 2009). All *D. discoideum*-symbiont genomes possessed multiple

504 type III secretions systems (T3SS) and type VI secretion systems (T6SS) in larger numbers

505 than several of the other *Paraburkholderia* genomes examined (Figure 5; Table S4).

506 Classification of T3SS showed that one specific T3SS operon shared among *D. discoideum*-

507 symbionts falls into category 8 T3SS (Figure 6 & S4). This category of T3SS also includes

508 BurBor found in the plant pathogen *Robbsia* (previously *Burkholderia*) *andropogonis* (Mannaa et

509 al. 2019), as well as *Bordatella* species that include mammalian pathogens (Kamanova 2020).

510 In addition, one specific T6SS operon is shared among *D. discoideum*-symbiont genomes and

511 belongs to category i1 (Figure 7 & S5). More importantly, this T6SS operon clusters together

512 with the virulence-causing T6SS-5 operon found in *Burkholderia mallei*, *B. pseudomallei*, and *B.*

513 *thailandensis* (Lennings et al. 2019). *B. mallei* causes glanders disease and is an obligate

514 pathogen that evolved from an ancestor shared with melioidosis-causing soil bacterium *B.*

515 *pseudomallei* (Schell et al. 2007; Burtnick et al. 2011; Losada et al. 2010). *B. thailandensis* is

516 sister species to the other two, and is a facultative pathogen similar to *B. pseudomallei* but with

517 much lower clinical virulence (Lennings et al. 2019).

518 The T6SS-5-like and BurBor-like T3SS operons shared by the *D. discoideum*-symbionts

519 are found directly next to each other on the respective genomes of *P. agriculturalis*, *P. bonniea*,

520 and *P. hayleyella*. *B. pseudomallei* and *B. thailandensis* also have a T3SS (T3SS-3 in the

521 literature) adjacent to their T6SS-5 but these T3SS-3 operons appear to be unrelated to the

522 BurBor-like T3SS found in the *D. discoideum*-symbiont genomes. It is worth noting that the two  
 523 adjacent T3SS-3 and T6SS-5 operons in *B. pseudomallei* and *B. thailandensis* have been  
 524 shown to be functionally linked and necessary for virulence, with the T3SS-3 effectors regulating  
 525 the expression of the adjacent T6SS-5 (Sun et al. 2010; Chen et al. 2011; Schwarz et al. 2010;  
 526 French et al. 2011).

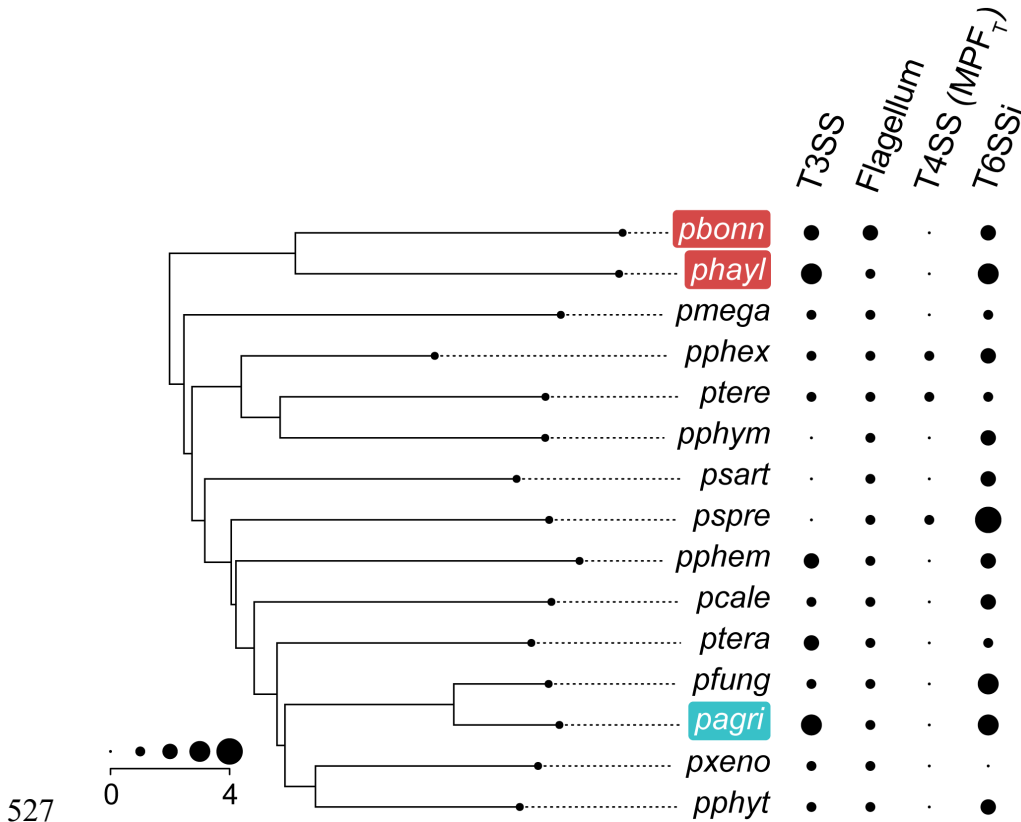

527  
 528 Figure 5. The abundances of secretion systems detected in *D. discoideum*-symbiont genomes  
 529 and other *Paraburkholderia*. For the Type 4 Secretion System, only protein secretion (as  
 530 opposed to conjugation-related) T4SS abundances are shown. The phylogeny is a species tree  
 531 based on Brock et al 2020. (*pagri* = *P. agricolaris*; *pbonn* = *P. bonniea*; *phayl* = *P. hayleyella*;  
 532 *pcale* = *P. caledonica*; *pfung* = *P. fungorum*, *pmega* = *P. megapolitana*, *pphem* = *P.*  
 533 *phenazinium*; *pphex* = *P. phenoliruptrix*; *pphym* = *P. phymatum*; *pphyt* = *P. phytofirmans*; *psart*  
 534 = *P. sartisoli*; *pspre* = *P. sprentiae*; *ptera* = *P. terricola*; *ptere* = *P. terrae*; *pxeno* = *P.*  
 535 *xenovorans*).





544 shown in bold font face with gene IDs for ease of reference. The clade containing the shared  
 545 T3SS operon is shaded.  
 546

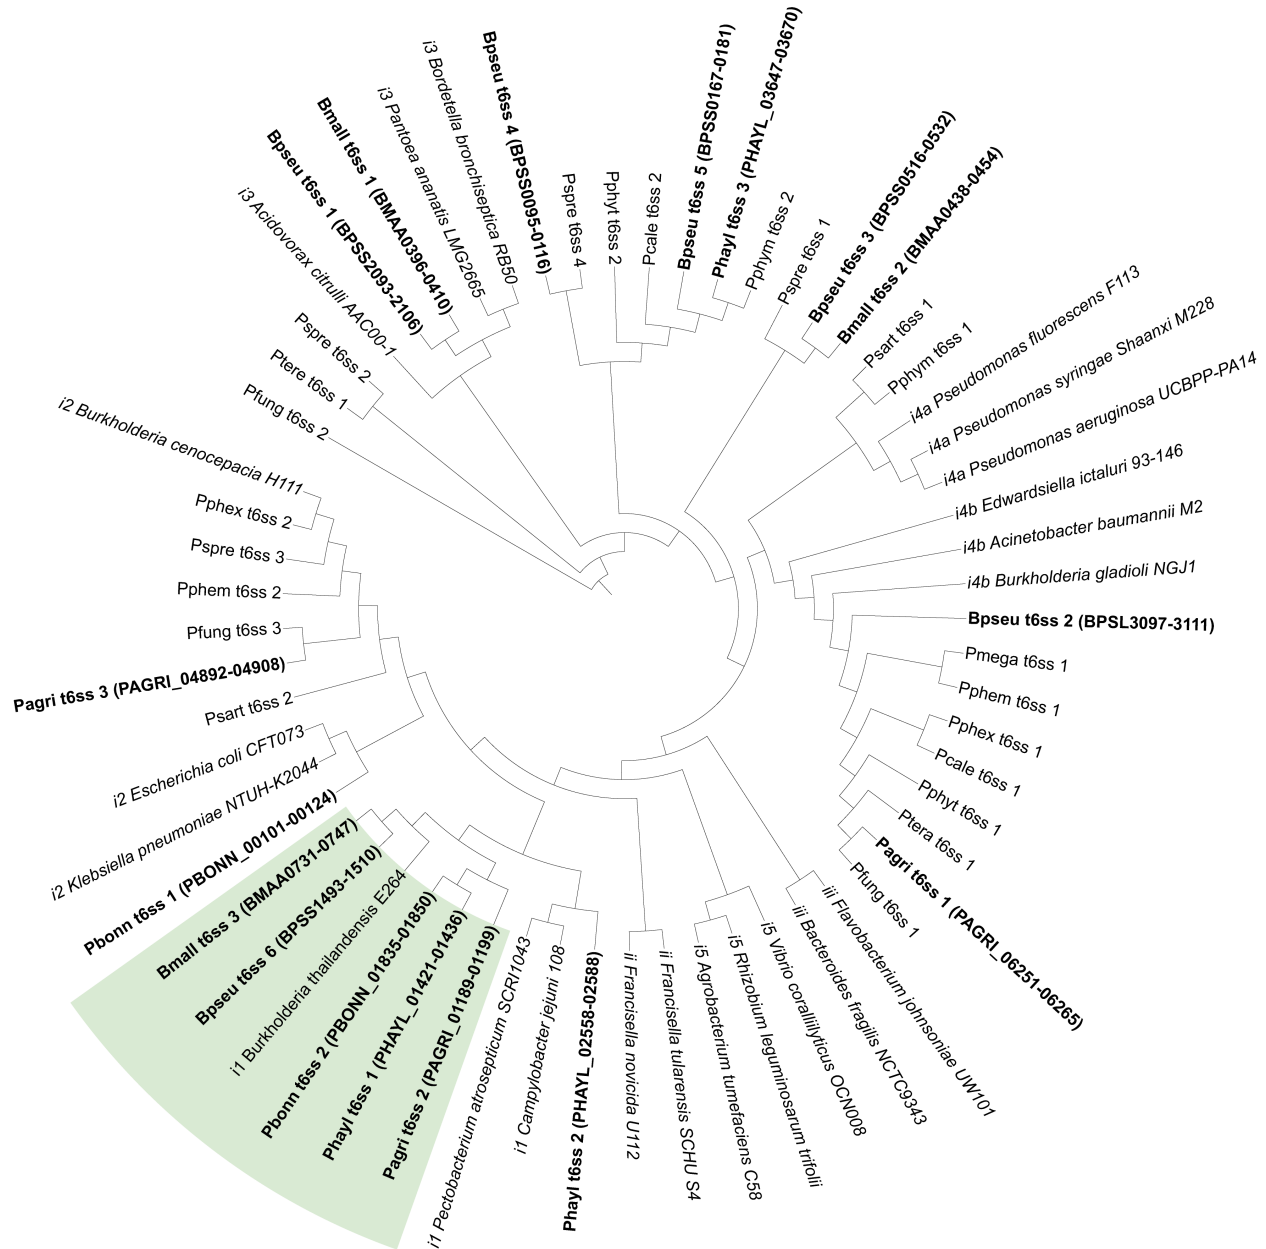

547  
 548 Figure 7. Type 6 secretion systems categorized using the conserved component genes tssB  
 549 (sheath; COG3516), tssC (sheath; COG3517), and tssF (baseplate; COG3519). Branch lengths  
 550 were ignored to improve readability of the ASTRAL tree topology. T6SS categories precede the  
 551 name of the strain to which the operon belongs (e.g. “ii Francisella novicida U112” is belongs to

552 category ii), downloaded from SecReT6 database v3.0 (Li et al. 2015). T6SS in the three *D.*  
553 *discoideum*-symbiont genomes and in *B. mallei* and *B. pseudomallei* are shown in bold font face  
554 with gene IDs for ease of reference. The clade containing the shared T6SS operon is shaded.

555

556 We attempted to identify effector proteins that might be functionally linked to these *D.*  
557 *discoideum*-symbiont secretion systems (Table S5). We identified homologs of the T6SS  
558 effector VgrG-5 that would likely be associated with the shared T6SS-5-like operon (Table S5).  
559 Unexpectedly, VgrG-5 in *P. agricolaris* (gene ID PAGRI\_01155) is a homolog but not an  
560 ortholog to VgrG-5 in the two reduced genomes (PBONN\_01842 and PHAYL\_01429). This  
561 suggests the possibility of two independent evolutionary origins of this T6SS effector, and  
562 potentially different functional roles. In *Burkholderia thailandensis*, VgrG-5 is necessary for post-  
563 infection cell-to-cell spread within mammalian hosts (Schwarz et al. 2014). For each genome,  
564 we predicted additional secretion system effectors, including a chaperonin ClpB and a  
565 sodium/solute symporter for *P. agricolaris*, and RHS (rearrangement hotspot) proteins that may  
566 mediate contact-dependent growth inhibition during bacterial competition for *P. hayleyella*.  
567 Lastly, we predicted secreted effectors containing eukaryotic domains specific to our Pfam clans  
568 of interest (Ank, TPR, LRR, Pentapeptide, F-box, and RING). Previous investigations of amoeba  
569 symbiont genomes have observed enrichment of proteins possessing these domains that  
570 hypothetically mediate physiological interactions with a eukaryotic host (Schmitz-Esser et al.  
571 2010; Gomez-Valero & Buchrieser 2019; Schulz et al. 2016). Notably, two proteins each directly  
572 adjacent to VgrG-5 in *P. agricolaris* (PAGRI\_01156-7) and *P. bonniea* (PBONN\_01840-1) each  
573 contained pentapeptide repeat domains. InterProScan searches indicated that two proteins in *P.*  
574 *hayleyella* (PHAYL\_01430-1) adjacent to VgrG-5 also contain pentapeptide repeat domains.  
575 However, no known functions are predicted for these protein pairs.

576

577 **Conclusion**

578           The genomes of *Paraburkholderia* symbionts of *D. discoideum* present a unique  
579 opportunity to compare the significantly differently-sized genomes of three symbiont species  
580 that share the ability to persistently infect *D. discoideum*. We find evidence that relative to the  
581 other *Paraburkholderia* genomes we investigated, all three *D. discoideum*-symbiont genomes  
582 have increased secretion system and motility genes that potentially mediate interactions with  
583 their host. Specifically, adjacent type 3 and type 6 secretion system operons shared across all  
584 three *D. discoideum*-symbiont genomes may have an important role. The BurBor-like T3SS  
585 operon is closely related to one found in the plant pathogen *Robbsia andropogonis*. It includes a  
586 needle apparatus uncommon among *Burkholderia* T3SS that is used to inject rhizobitoxine into  
587 a wide range of plant hosts (Wallner et al. 2021; Mannaa et al. 2019). The adjacent T6SS  
588 operon is closely related to T6SS-5 shared by *B. mallei*, *B. pseudomallei*, and *B. thailandensis*.  
589 T6SS-5 is functionally important for the intercellular lifecycle of these pathogenic *Burkholderia*  
590 (Schwarz et al. 2014). We hypothesize that the BurBor-like T3SS operon is used during initial  
591 host infection and the T6SS-5-like operon may have a functional role post-infection. We also  
592 find orthologs to the T6 effector VgrG-5 specific to T6SS-5, as well as two neighboring potential  
593 effectors with eukaryote-like pentapeptide repeat domains in the three *D. discoideum*-symbiont  
594 genomes. Some but not all of the component genes of the shared T6SS-5-like and BurBor-like  
595 T3SS operons are among the 120 *D. discoideum*-symbiont-shared genes not found in any of  
596 the other *Paraburkholderia* genomes we compared. It is intriguing to consider the possibility that  
597 these genes were transferred among symbiont genomes within the *D. discoideum* amoeba host  
598 environment. Different *D. discoideum*-symbiont species have been found coinfecting amoeba  
599 hosts (Haselkorn et al. 2019), and diverse *Acanthamoeba* symbionts appear to share genes  
600 with each other that are functionally enriched for host interaction (Wang & Wu 2017).

601           While the secretion system features shared among *Paraburkholderia* symbionts of *D.*  
602 *discoideum* are striking, *P. agricolaris* is otherwise difficult to distinguish from other  
603 *Paraburkholderia* based on its genome size and content. However, the two reduced genomes of

604 *P. bonniea* and *P. hayleyella* display characteristics that support their evolution in a host  
605 environment. All three species retain the ability to live outside of *D. discoideum*, but the  
606 genomes of *P. bonniea* and *P. hayleyella* show fewer transcriptional regulators, as well as fewer  
607 carbohydrate and inorganic ion transporters. The reduced genomes possess a combination of  
608 genes with molecular evolution patterns that indicate specific responses to the host environment  
609 (both stronger and weaker evolutionary constraints) rather than uniform deterioration under  
610 genetic drift. In addition, the lack of IS element proliferation and absence of excessive  
611 pseudogene accumulation compared to other *Paraburkholderia* genomes indicate that these  
612 already reduced genomes are relatively stable.

613         These combined pieces of evidence supports that the reduced genome *D. discoideum*-  
614 symbionts are professional symbionts specifically adapted to their protists hosts. We adopt the  
615 term “professional symbiont” from Husnik and colleagues (2021) to refer to symbiont lineages  
616 that are ancestrally adapted to their specific hosts, that possess compact and streamlined  
617 genomes. Accordingly, we hypothesize that the symbiotic relationship between *D. discoideum*  
618 and the species with reduced genomes is persistent and potentially quite old. However, given  
619 the short generation time of protists it is entirely possible that what we call “old” is not as ancient  
620 as the symbioses and similarly stable stages of genome reduction observed in microbial  
621 symbionts of multicellular eukaryotes. In contrast to *P. bonniea* or *P. hayleyella*, intraspecific  
622 genetic variation appears to be larger for *P. agricolaris* (Haselkorn et al. 2019), suggesting that  
623 *P. agricolaris* host adaptation may be ongoing and more dynamic. We look forward to  
624 expanding these analyses to a larger collection of *D. discoideum*-symbiont genomes in the  
625 future, to identify both convergent and divergent host adaptation patterns among *D. discoideum*-  
626 symbionts and to continue to add to a growing body of work across diverse protist-prokaryote  
627 symbioses.

628

629

630 **Acknowledgements**

631 We thank students and colleagues from the Noh lab (Anna Chen, Kayla Dixon, Laura Drepanos)  
632 and Strassmann-Queller lab (Tammy Haselkorn, Clarissa Dzikunu) who contributed to aspects  
633 of this project during its development. This work is supported by the National Science  
634 Foundation under Grant Numbers IOS 1656756 and DEB 1753743 (JS and DQ), and by the  
635 National Institutes of Health and its National Institute of General Medical Sciences by an  
636 Institutional Development Award (IDeA) under Grant Numbers P20GM103423 (subaward to SN)  
637 and Colby College startup funds (SN).

638

639

640 **Reference**

641 Abby S, Daubin V. 2007. Comparative genomics and the evolution of prokaryotes. *Trends in*  
642 *Microbiology*. 15:135–141. doi: 10.1016/j.tim.2007.01.007.

643 Abby SS et al. 2016. Identification of protein secretion systems in bacterial genomes. *Sci Rep*.  
644 6:23080. doi: 10.1038/srep23080.

645 Altschul SF et al. 1997. Gapped BLAST and PSI-BLAST: a new generation of protein database  
646 search programs. *Nucleic Acids Research*. 25:3389–3402. doi: 10.1093/nar/25.17.3389.

647 Andersson SGE, Kurland CG. 1998. Reductive evolution of resident genomes. *Trends in*  
648 *Microbiology*. 6:263–268. doi: 10.1016/S0966-842X(98)01312-2.

649 Arnold BJ, Huang I-T, Hanage WP. 2022. Horizontal gene transfer and adaptive evolution in  
650 bacteria. *Nat Rev Microbiol*. 20:206–218. doi: 10.1038/s41579-021-00650-4.

651 Bertelli C et al. 2017. IslandViewer 4: expanded prediction of genomic islands for larger-scale  
652 datasets. *Nucleic Acids Research*. 45:W30–W35. doi: 10.1093/nar/gkx343.

653 Bertelli C, Tilley KE, Brinkman FSL. 2019. Microbial genomic island discovery, visualization  
654 and analysis. *Brief Bioinform*. 20:1685–1698. doi: 10.1093/bib/bby042.

655 Bliven KA, Maurelli AT. 2012. Antivirulence genes: insights into pathogen evolution through  
656 gene loss. *Infection and Immunity*. 80:4061–4070. doi: 10.1128/IAI.00740-12.

657 Bozzaro S, Eichinger L. 2011. The professional phagocyte *Dictyostelium discoideum* as a model  
658 host for bacterial pathogens. *Curr Drug Targets*. 12:942–954. doi:  
659 10.2174/138945011795677782.

- 660 Brock DA et al. 2020. Endosymbiotic adaptations in three new bacterial species associated with  
661 *Dictyostelium discoideum*: *Paraburkholderia agricolaris* sp. nov., *Paraburkholderia hayleyella*  
662 sp. nov., and *Paraburkholderia bonniea* sp. nov. PeerJ. 8:e9151. doi: 10.7717/peerj.9151.
- 663 Brock DA, Douglas TE, Queller DC, Strassmann JE. 2011. Primitive agriculture in a social  
664 amoeba. Nature. 469:393–396. doi: 10.1038/nature09668.
- 665 Brock DA, Read S, Bozhchenko A, Queller DC, Strassmann JE. 2013. Social amoeba farmers  
666 carry defensive symbionts to protect and privatize their crops. Nature Communications. 4:2385.  
667 doi: 10.1038/ncomms3385.
- 668 Brockhurst MA et al. 2019. The ecology and evolution of pangenomes. Current Biology.  
669 29:R1094–R1103. doi: 10.1016/j.cub.2019.08.012.
- 670 Buchfink B, Xie C, Huson DH. 2015. Fast and sensitive protein alignment using DIAMOND.  
671 Nat Methods. 12:59–60. doi: 10.1038/nmeth.3176.
- 672 Buels R et al. 2016. JBrowse: a dynamic web platform for genome visualization and analysis.  
673 Genome Biol. 17:66. doi: 10.1186/s13059-016-0924-1.
- 674 Burtnick MN et al. 2011. The cluster 1 type VI secretion system Is a major virulence determinant  
675 in *Burkholderia pseudomallei*. Infection and Immunity. 79:1512–1525. doi: 10.1128/IAI.01218-  
676 10.
- 677 Chen L et al. 2005. VFDB: a reference database for bacterial virulence factors. Nucleic Acids  
678 Research. 33:D325–D328. doi: 10.1093/nar/gki008.
- 679 Chen Y et al. 2011. Regulation of type VI secretion system during *Burkholderia pseudomallei*  
680 infection. Infection and Immunity. 79:3064–3073. doi: 10.1128/IAI.05148-11.
- 681 Chin C-S et al. 2013. Nonhybrid, finished microbial genome assemblies from long-read SMRT  
682 sequencing data. Nat Methods. 10:563–569. doi: 10.1038/nmeth.2474.
- 683 Chua KL, Chan YY, Gan YH. 2003. Flagella are virulence determinants of *Burkholderia*  
684 *pseudomallei*. Infection and Immunity. 71:1622–1629. doi: 10.1128/IAI.71.4.1622-1629.2003.
- 685 Coenye T et al. 2001. *Burkholderia fungorum* sp. nov. and *Burkholderia caledonica* sp. nov.,  
686 two new species isolated from the environment, animals and human clinical samples. Int. J. Syst.  
687 Evol. Microbiol. 51:1099–1107. doi: 10.1099/00207713-51-3-1099.
- 688 Coenye T, Henry D, Speert DP, Vandamme P. 2004. *Burkholderia phenoliruptrix* sp. nov., to  
689 accommodate the 2,4,5-trichlorophenoxyacetic acid and halophenol-degrading strain AC1100.  
690 Systematic and Applied Microbiology. 27:623–627. doi: 10.1078/0723202042369992.
- 691 Coombes BK. 2009. Type III secretion systems in symbiotic adaptation of pathogenic and non-  
692 pathogenic bacteria. Trends in Microbiology. 17:89–94. doi: 10.1016/j.tim.2008.11.006.

- 693 Cosson P, Soldati T. 2008. Eat, kill or die: when amoeba meets bacteria. *Current Opinion in*  
694 *Microbiology*. 11:271–276. doi: 10.1016/j.mib.2008.05.005.
- 695 Darling AE, Mau B, Perna NT. 2010. progressiveMauve: multiple genome alignment with gene  
696 gain, loss and rearrangement. *PLOS ONE*. 5:e11147. doi: 10.1371/journal.pone.0011147.
- 697 De Meyer SE et al. 2013. *Burkholderia spreintiae* sp. nov., isolated from *Lebeckia ambigua* root  
698 nodules. *International Journal of Systematic and Evolutionary Microbiology*. 63:3950–3957. doi:  
699 10.1099/ijms.0.048777-0.
- 700 Delaye L, Vargas C, Latorre A, Moya A. 2020. Inferring horizontal gene transfer with  
701 DarkHorse, Phylomizer, and ETE Toolkits. *Methods Mol Biol*. 2075:355–369. doi: 10.1007/978-  
702 1-4939-9877-7\_25.
- 703 DiSalvo S et al. 2015. *Burkholderia* bacteria infectiously induce the proto-farming symbiosis of  
704 *Dictyostelium* amoebae and food bacteria. *PNAS*. 112:E5029–E5037. doi:  
705 10.1073/pnas.1511878112.
- 706 Dobrindt U, Hochhut B, Hentschel U, Hacker J. 2004. Genomic islands in pathogenic and  
707 environmental microorganisms. *Nat Rev Microbiol*. 2:414–424. doi: 10.1038/nrmicro884.
- 708 Drew GC, Stevens EJ, King KC. 2021. Microbial evolution and transitions along the parasite–  
709 mutualist continuum. *Nat Rev Microbiol*. 19:623–638. doi: 10.1038/s41579-021-00550-7.
- 710 Duan Q, Zhou M, Zhu L, Zhu G. 2013. Flagella and bacterial pathogenicity. *Journal of Basic*  
711 *Microbiology*. 53:1–8. doi: 10.1002/jobm.201100335.
- 712 Dunn JD et al. 2017. Eat prey, live: *Dictyostelium discoideum* as a model for cell-autonomous  
713 defenses. *Front Immunol*. 8:1906. doi: 10.3389/fimmu.2017.01906.
- 714 Edgar RC. 2004. MUSCLE: multiple sequence alignment with high accuracy and high  
715 throughput. *Nucleic Acids Research*. 32:1792–1797. doi: 10.1093/nar/gkh340.
- 716 Eichinger V et al. 2016. EffectiveDB—updates and novel features for a better annotation of  
717 bacterial secreted proteins and Type III, IV, VI secretion systems. *Nucleic Acids Research*.  
718 44:D669–D674. doi: 10.1093/nar/gkv1269.
- 719 Finlay BB, Falkow S. 1997. Common themes in microbial pathogenicity revisited. *Microbiology*  
720 *and Molecular Biology Reviews*. 61:136–169. doi: 10.1128/mmbr.61.2.136-169.1997.
- 721 French CT et al. 2011. Dissection of the *Burkholderia* intracellular life cycle using a  
722 photothermal nanoblade. *Proceedings of the National Academy of Sciences*. 108:12095–12100.  
723 doi: 10.1073/pnas.1107183108.
- 724 Galperin MY, Makarova KS, Wolf YI, Koonin EV. 2015. Expanded microbial genome coverage  
725 and improved protein family annotation in the COG database. *Nucleic Acids Research*.  
726 43:D261–D269. doi: 10.1093/nar/gku1223.



- 727 Garcia JR, Larsen TJ, Queller DC, Strassmann JE. 2019. Fitness costs and benefits vary for two  
728 facultative *Burkholderia* symbionts of the social amoeba, *Dictyostelium discoideum*. *Ecology*  
729 and *Evolution*. 9:9878–9890. doi: 10.1002/ece3.5529.
- 730 Garmory HS, Titball RW. 2004. ATP-binding cassette transporters are targets for the  
731 development of antibacterial vaccines and therapies. *Infection and Immunity*. 72:6757–6763.  
732 doi: 10.1128/IAI.72.12.6757-6763.2004.
- 733 Gomez-Valero L, Buchrieser C. 2019. Intracellular parasitism, the driving force of evolution of  
734 *Legionella pneumophila* and the genus *Legionella*. *Microbes and Infection*. 21:230–236. doi:  
735 10.1016/j.micinf.2019.06.012.
- 736 Goris J et al. 2004. Classification of the biphenyl- and polychlorinated biphenyl-degrading strain  
737 LB400T and relatives as *Burkholderia xenovorans* sp. nov. *International Journal of Systematic*  
738 and *Evolutionary Microbiology*. 54:1677–1681. doi: 10.1099/ijs.0.63101-0.
- 739 Goris J et al. 2002. Diversity of transconjugants that acquired plasmid pJP4 or pEMT1 after  
740 inoculation of a donor strain in the A- and B-horizon of an agricultural soil and description of  
741 *Burkholderia hospita* sp. nov. and *Burkholderia terricola* sp. nov. *Systematic and Applied*  
742 *Microbiology*. 25:340–352. doi: 10.1078/0723-2020-00134.
- 743 Hacker J, Carniel E. 2001. Ecological fitness, genomic islands and bacterial pathogenicity.  
744 *EMBO reports*. 2:376–381. doi: 10.1093/embo-reports/kve097.
- 745 Harland DN, Dassa E, Titball RW, Brown KA, Atkins HS. 2007. ATP-binding cassette systems  
746 in *Burkholderia pseudomallei* and *Burkholderia mallei*. *BMC Genomics*. 8:83. doi:  
747 10.1186/1471-2164-8-83.
- 748 Haselkorn TS et al. 2019. The specificity of *Burkholderia* symbionts in the social amoeba  
749 farming symbiosis: prevalence, species, genetic and phenotypic diversity. *Molecular Ecology*.  
750 28:847–862. doi: 10.1111/mec.14982.
- 751 Hentschel U. 2021. Harnessing the power of host–microbe symbioses to address grand  
752 challenges. *Nat Rev Microbiol*. 19:615–616. doi: 10.1038/s41579-021-00619-3.
- 753 Hu Y et al. 2017. A global survey of bacterial type III secretion systems and their effectors.  
754 *Environmental Microbiology*. 19:3879–3895. doi: 10.1111/1462-2920.13755.
- 755 Hunt M et al. 2015. Circlator: automated circularization of genome assemblies using long  
756 sequencing reads. *Genome Biology*. 16:294. doi: 10.1186/s13059-015-0849-0.
- 757 Huntemann M et al. 2015. The standard operating procedure of the DOE-JGI Microbial Genome  
758 Annotation Pipeline (MGAP v.4). *Standards in Genomic Sciences*. 10:86. doi: 10.1186/s40793-  
759 015-0077-y.
- 760 Husnik F et al. 2021. Bacterial and archaeal symbioses with protists. *Current Biology*. 31:R862–  
761 R877. doi: 10.1016/j.cub.2021.05.049.

- 762 Jehl M-A, Arnold R, Rattei T. 2011. Effective—a database of predicted secreted bacterial  
763 proteins. *Nucleic Acids Research*. 39:D591–D595. doi: 10.1093/nar/gkq1154.
- 764 Jones P et al. 2014. InterProScan 5: genome-scale protein function classification. *Bioinformatics*.  
765 30:1236–1240. doi: 10.1093/bioinformatics/btu031.
- 766 Kamanova J. 2020. Bordetella type III secretion injectosome and effector proteins. *Frontiers in*  
767 *Cellular and Infection Microbiology*. 10:466.
- 768 Kanehisa M, Furumichi M, Tanabe M, Sato Y, Morishima K. 2017. KEGG: new perspectives on  
769 genomes, pathways, diseases and drugs. *Nucleic Acids Research*. 45:D353–D361. doi:  
770 10.1093/nar/gkw1092.
- 771 Kanehisa M, Sato Y. 2020. KEGG Mapper for inferring cellular functions from protein  
772 sequences. *Protein Science*. 29:28–35. doi: 10.1002/pro.3711.
- 773 Kanehisa M, Sato Y, Kawashima M, Furumichi M, Tanabe M. 2016. KEGG as a reference  
774 resource for gene and protein annotation. *Nucleic Acids Research*. 44:D457–D462. doi:  
775 10.1093/nar/gkv1070.
- 776 Kanehisa M, Sato Y, Morishima K. 2016. BlastKOALA and GhostKOALA: KEGG Tools for  
777 Functional Characterization of Genome and Metagenome Sequences. *Journal of Molecular*  
778 *Biology*. 428:726–731. doi: 10.1016/j.jmb.2015.11.006.
- 779 Krzywinski M, Birol I, Jones SJ, Marra MA. 2012. Hive plots—rational approach to visualizing  
780 networks. *Briefings in Bioinformatics*. 13:627–644. doi: 10.1093/bib/bbr069.
- 781 Langille MGI, Hsiao WWL, Brinkman FSL. 2010. Detecting genomic islands using  
782 bioinformatics approaches. *Nat Rev Microbiol*. 8:373–382. doi: 10.1038/nrmicro2350.
- 783 Lawrence JG, Ochman H. 1997. Amelioration of bacterial genomes: rates of change and  
784 exchange. *J Mol Evol*. 44:383–397. doi: 10.1007/pl00006158.
- 785 Lennings J, West TE, Schwarz S. 2019. The *Burkholderia* type VI secretion system 5:  
786 composition, regulation and role in virulence. *Frontiers in Microbiology*. 9:3339.
- 787 Li J et al. 2015. SecReT6: a web-based resource for type VI secretion systems found in bacteria.  
788 *Environmental Microbiology*. 17:2196–2202. doi: 10.1111/1462-2920.12794.
- 789 Liu Y, Harrison PM, Kunin V, Gerstein M. 2004. Comprehensive analysis of pseudogenes in  
790 prokaryotes: widespread gene decay and failure of putative horizontally transferred genes.  
791 *Genome Biology*. 5:R64. doi: 10.1186/gb-2004-5-9-r64.
- 792 Lo W-S, Huang Y-Y, Kuo C-H. 2016. Winding paths to simplicity: genome evolution in  
793 facultative insect symbionts. *FEMS Microbiology Reviews*. 40:855–874. doi:  
794 10.1093/femsre/fuw028.

- 795 Losada L et al. 2010. Continuing evolution of *Burkholderia mallei* through genome reduction  
796 and large-scale rearrangements. *Genome Biology and Evolution*. 2:102–116. doi:  
797 10.1093/gbe/evq003.
- 798 Mangalea MR, Plumley BA, Borlee BR. 2017. Nitrate sensing and metabolism inhibit biofilm  
799 formation in the opportunistic pathogen *Burkholderia pseudomallei* by reducing the intracellular  
800 concentration of c-di-GMP. *Frontiers in Microbiology*. 8.  
801 <https://www.frontiersin.org/article/10.3389/fmicb.2017.01353> (Accessed March 17, 2022).
- 802 Mannaa M, Park I, Seo Y-S. 2019. Genomic features and insights into the taxonomy, virulence,  
803 and benevolence of plant-associated *Burkholderia* species. *International Journal of Molecular*  
804 *Sciences*. 20:121. doi: 10.3390/ijms20010121.
- 805 Manzano-Marín A, Latorre A. 2016. Snapshots of a shrinking partner: genome reduction in  
806 *Serratia symbiotica*. *Scientific Reports*. 6:32590. doi: 10.1038/srep32590.
- 807 Maurelli AT. 2007. Black holes, antivirulence genes, and gene inactivation in the evolution of  
808 bacterial pathogens. *FEMS Microbiology Letters*. 267:1–8. doi: 10.1111/j.1574-  
809 6968.2006.00526.x.
- 810 McCutcheon JP, Boyd BM, Dale C. 2019. The life of an insect endosymbiont from the cradle to  
811 the grave. *Current Biology*. 29:R485–R495. doi: 10.1016/j.cub.2019.03.032.
- 812 McCutcheon JP, Moran NA. 2012. Extreme genome reduction in symbiotic bacteria. *Nat Rev*  
813 *Microbiol*. 10:13–26. doi: 10.1038/nrmicro2670.
- 814 McMurdie PJ, Holmes S. 2014. Waste not, want not: why rarefying microbiome data is  
815 inadmissible. *PLOS Computational Biology*. 10:e1003531. doi: 10.1371/journal.pcbi.1003531.
- 816 Merhej V, Georgiades K, Raoult D. 2013. Postgenomic analysis of bacterial pathogens repertoire  
817 reveals genome reduction rather than virulence factors. *Briefings in Functional Genomics*.  
818 12:291–304. doi: 10.1093/bfpg/elt015.
- 819 Merhej V, Royer-Carenzi M, Pontarotti P, Raoult D. 2009. Massive comparative genomic  
820 analysis reveals convergent evolution of specialized bacteria. *Biology Direct*. 4:13. doi:  
821 10.1186/1745-6150-4-13.
- 822 Miller JW, Bocke CR, Tresslar AR, Schniepp EM, DiSalvo S. 2020. *Paraburkholderia*  
823 symbionts display variable infection patterns that are not predictive of amoeba host outcomes.  
824 *Genes*. 11:674. doi: 10.3390/genes11060674.
- 825 Moran NA. 2002. Microbial minimalism: genome reduction in bacterial pathogens. *Cell*.  
826 108:583–586. doi: 10.1016/S0092-8674(02)00665-7.
- 827 Moran NA, McCutcheon JP, Nakabachi A. 2008. Genomics and evolution of heritable bacterial  
828 symbionts. *Annual Review of Genetics*. 42:165–190. doi:  
829 10.1146/annurev.genet.41.110306.130119.

- 830 Moran NA, Plague GR. 2004. Genomic changes following host restriction in bacteria. *Curr.*  
831 *Opin. Genet. Dev.* 14:627–633. doi: 10.1016/j.gde.2004.09.003.
- 832 Murphy ER et al. 2002. BhuR, a virulence-associated outer membrane protein of *Bordetella*  
833 *avium*, is required for the acquisition of iron from heme and hemoproteins. *Infection and*  
834 *Immunity.* 70:5390–5403. doi: 10.1128/IAI.70.10.5390-5403.2002.
- 835 Nierman WC et al. 2004. Structural flexibility in the *Burkholderia mallei* genome. *Proceedings*  
836 *of the National Academy of Sciences.* 101:14246–14251. doi: 10.1073/pnas.0403306101.
- 837 Ochman H, Davalos LM. 2006. The nature and dynamics of bacterial genomes. *Science.*  
838 311:1730–1733. doi: 10.1126/science.1119966.
- 839 Ottemann KM, Miller JF. 1997. Roles for motility in bacterial–host interactions. *Molecular*  
840 *Microbiology.* 24:1109–1117. doi: 10.1046/j.1365-2958.1997.4281787.x.
- 841 Page AJ et al. 2015. Roary: rapid large-scale prokaryote pan genome analysis. *Bioinformatics.*  
842 31:3691–3693. doi: 10.1093/bioinformatics/btv421.
- 843 Podell S, Gaasterland T. 2007. DarkHorse: a method for genome-wide prediction of horizontal  
844 gene transfer. *Genome Biology.* 8:R16. doi: 10.1186/gb-2007-8-2-r16.
- 845 Price MN et al. 2018. Filling gaps in bacterial amino acid biosynthesis pathways with high-  
846 throughput genetics. *PLOS Genetics.* 14:e1007147. doi: 10.1371/journal.pgen.1007147.
- 847 Price MN, Dehal PS, Arkin AP. 2010. FastTree 2 – Approximately Maximum-Likelihood Trees  
848 for Large Alignments. *PLOS ONE.* 5:e9490. doi: 10.1371/journal.pone.0009490.
- 849 Price MN, Deutschbauer AM, Arkin AP. 2020. GapMind: automated annotation of amino acid  
850 biosynthesis. *mSystems.* 5:e00291-20. doi: 10.1128/mSystems.00291-20.
- 851 R Core Team. 2019. *R: A language and environment for statistical computing.* R Foundation for  
852 Statistical Computing: Vienna, Austria.
- 853 Robinson MD, McCarthy DJ, Smyth GK. 2010. edgeR: a Bioconductor package for differential  
854 expression analysis of digital gene expression data. *Bioinformatics.* 26:139–140. doi:  
855 10.1093/bioinformatics/btp616.
- 856 Sabater-Muñoz B, Toft C, Alvarez-Ponce D, Fares MA. 2017. Chance and necessity in the  
857 genome evolution of endosymbiotic bacteria of insects. *ISME J.* 11:1291–1304. doi:  
858 10.1038/ismej.2017.18.
- 859 Schaefers MM. 2020. Regulation of virulence by two-component systems in pathogenic  
860 *Burkholderia.* *Infection and Immunity.* 88:e00927-19. doi: 10.1128/IAI.00927-19.
- 861 Schell MA et al. 2007. Type VI secretion is a major virulence determinant in *Burkholderia*  
862 *mallei.* *Mol Microbiol.* 64:1466–1485. doi: 10.1111/j.1365-2958.2007.05734.x.

- 863 Schmitz-Esser S et al. 2010. The genome of the amoeba symbiont ‘Candidatus Amoebophilus  
864 asiaticus’ reveals common mechanisms for host cell interaction among amoeba-associated  
865 bacteria. *Journal of Bacteriology*. 192:1045–1057. doi: 10.1128/JB.01379-09.
- 866 Schulz F et al. 2016. A Rickettsiales symbiont of amoebae with ancient features. *Environmental  
867 Microbiology*. 18:2326–2342. doi: 10.1111/1462-2920.12881.
- 868 Schwarz S et al. 2010. Burkholderia type VI secretion systems have distinct roles in eukaryotic  
869 and bacterial cell interactions. *PLOS Pathogens*. 6:e1001068. doi: 10.1371/journal.ppat.1001068.
- 870 Schwarz S et al. 2014. VgrG-5 Is a *Burkholderia* type VI secretion system-exported protein  
871 required for multinucleated giant cell formation and virulence. *Infection and Immunity*.  
872 82:1445–1452. doi: 10.1128/IAI.01368-13.
- 873 Scott TJ, Queller DC, Strassmann JE. in press. Context dependence in the symbiosis between  
874 *Dictyostelium discoideum* and *Paraburkholderia*. *Evolution Letters*. n/a. doi: 10.1002/evl3.281.
- 875 Seemann T. 2014. Prokka: rapid prokaryotic genome annotation. *Bioinformatics*. 30:2068–2069.  
876 doi: 10.1093/bioinformatics/btu153.
- 877 Seigle-Murandi F, Guiraud P, Croize J, Falsen E, Eriksson KL. 1996. Bacteria are omnipresent  
878 on *Phanerochaete chrysosporium* Burdsall. *Appl. Environ. Microbiol.* 62:2477–2481. doi:  
879 10.1128/aem.62.7.2477-2481.1996.
- 880 Sessitsch A et al. 2005. *Burkholderia phytofirmans* sp. nov., a novel plant-associated bacterium  
881 with plant-beneficial properties. *International Journal of Systematic and Evolutionary  
882 Microbiology*. 55:1187–1192. doi: 10.1099/ijs.0.63149-0.
- 883 Shu L, Brock DA, et al. 2018. Symbiont location, host fitness, and possible coadaptation in a  
884 symbiosis between social amoebae and bacteria Ruzzini, T, editor. *eLife*. 7:e42660. doi:  
885 10.7554/eLife.42660.
- 886 Shu L, Zhang B, Queller DC, Strassmann JE. 2018. *Burkholderia* bacteria use chemotaxis to find  
887 social amoeba *Dictyostelium discoideum* hosts. *ISME J*. 12:1977–1993. doi: 10.1038/s41396-  
888 018-0147-4.
- 889 Siguier P, Perochon J, Lestrade L, Mahillon J, Chandler M. 2006. ISfinder: the reference centre  
890 for bacterial insertion sequences. *Nucleic Acids Research*. 34:D32–D36. doi:  
891 10.1093/nar/gkj014.
- 892 Skinner ME, Uzilov AV, Stein LD, Mungall CJ, Holmes IH. 2009. JBrowse: a next-generation  
893 genome browser. *Genome Res*. 19:1630–1638. doi: 10.1101/gr.094607.109.
- 894 Sun GW et al. 2010. Identification of a regulatory cascade controlling Type III Secretion System  
895 3 gene expression in *Burkholderia pseudomallei*. *Molecular Microbiology*. 76:677–689. doi:  
896 10.1111/j.1365-2958.2010.07124.x.

- 897 Suyama M, Torrents D, Bork P. 2006. PAL2NAL: robust conversion of protein sequence  
898 alignments into the corresponding codon alignments. *Nucleic Acids Research*. 34:W609–W612.  
899 doi: 10.1093/nar/gkl315.
- 900 Syberg-Olsen MJ, Garber AI, Keeling PJ, McCutcheon JP, Husnik F. 2021. Pseudofinder:  
901 detection of pseudogenes in prokaryotic genomes. 2021.10.07.463580. doi:  
902 10.1101/2021.10.07.463580.
- 903 Tatusov RL, Galperin MY, Natale DA, Koonin EV. 2000. The COG database: a tool for  
904 genome-scale analysis of protein functions and evolution. *Nucleic Acids Res*. 28:33–36.
- 905 Tipton L, Darcy JL, Hynson NA. 2019. A developing symbiosis: enabling cross-talk between  
906 ecologists and microbiome scientists. *Front Microbiol*. 10:292. doi: 10.3389/fmicb.2019.00292.
- 907 Toft C, Andersson SGE. 2010. Evolutionary microbial genomics: insights into bacterial host  
908 adaptation. *Nature Reviews Genetics*. 11:465–475. doi: 10.1038/nrg2798.
- 909 Tseng T-T, Tyler BM, Setubal JC. 2009. Protein secretion systems in bacterial-host associations,  
910 and their description in the Gene Ontology. *BMC Microbiology*. 9:S2. doi: 10.1186/1471-2180-  
911 9-S1-S2.
- 912 Vachaspati P, Warnow T. 2015. ASTRID: Accurate Species TREes from Internode Distances.  
913 *BMC Genomics*. 16:S3. doi: 10.1186/1471-2164-16-S10-S3.
- 914 Vandamme P et al. 2007. *Burkholderia bryophila* sp. nov. and *Burkholderia megapolitana* sp.  
915 nov., moss-associated species with antifungal and plant-growth-promoting properties |  
916 Microbiology Society. *International Journal of Systematic and Evolutionary Microbiology*.  
917 57:2228–2235. doi: <https://doi.org/10.1099/ijms.0.65142-0>.
- 918 Vandamme P, Goris J, Chen W-M, de Vos P, Willems A. 2002. *Burkholderia tuberum* sp. nov.  
919 and *Burkholderia phymatum* sp. nov., nodulate the roots of tropical legumes. *Systematic and*  
920 *Applied Microbiology*. 25:507–512. doi: 10.1078/07232020260517634.
- 921 Vanderpool CK, Armstrong SK. 2001. The *Bordetella bhv* locus is required for heme iron  
922 utilization. *Journal of Bacteriology*. 183:4278–4287. doi: 10.1128/JB.183.14.4278-4287.2001.
- 923 Vanlaere E et al. 2008. *Burkholderia sartisoli* sp. nov., isolated from a polycyclic aromatic  
924 hydrocarbon-contaminated soil. *International Journal of Systematic and Evolutionary*  
925 *Microbiology*. 58:420–423. doi: 10.1099/ijms.0.65451-0.
- 926 Viallard V et al. 1998. *Burkholderia graminis* sp. nov., a rhizospheric Burkholderia species, and  
927 reassessment of [*Pseudomonas*] *phenazinium*, [*Pseudomonas*] *pyrrocinia* and [*Pseudomonas*]  
928 *glathei* as *Burkholderia*. *International Journal of Systematic and Evolutionary Microbiology*.  
929 48:549–563. doi: 10.1099/00207713-48-2-549.
- 930 Wallner A, Moulin L, Busset N, Rimbault I, Béna G. 2021. Genetic diversity of type 3 secretion  
931 system in *Burkholderia s.l.* and links with plant host adaptation. *Frontiers in Microbiology*. 12.  
932 <https://www.frontiersin.org/article/10.3389/fmicb.2021.761215> (Accessed March 31, 2022).

- 933 Wang J et al. 2021. BastionHub: a universal platform for integrating and analyzing substrates  
934 secreted by Gram-negative bacteria. *Nucleic Acids Research*. 49:D651–D659. doi:  
935 10.1093/nar/gkaa899.
- 936 Wang Z, Wu M. 2017. Comparative genomic analysis of *Acanthamoeba* endosymbionts  
937 highlights the role of amoebae as a “melting pot” shaping the *Rickettsiales* evolution. *Genome*  
938 *Biology and Evolution*. 9:3214–3224. doi: 10.1093/gbe/evx246.
- 939 Wernegreen JJ. 2017. In it for the long haul: evolutionary consequences of persistent  
940 endosymbiosis. *Current Opinion in Genetics & Development*. 47:83–90. doi:  
941 10.1016/j.gde.2017.08.006.
- 942 Wilcox JL, Dunbar HE, Wolfinger RD, Moran NA. 2003. Consequences of reductive evolution  
943 for gene expression in an obligate endosymbiont. *Molecular Microbiology*. 48:1491–1500. doi:  
944 10.1046/j.1365-2958.2003.03522.x.
- 945 Winsor GL et al. 2008. The Burkholderia Genome Database: facilitating flexible queries and  
946 comparative analyses. *Bioinformatics*. 24:2803–2804. doi: 10.1093/bioinformatics/btn524.
- 947 Yang H-C, Im W-T, Kim KK, An D-S, Lee S-T. 2006. *Burkholderia terrae* sp. nov., isolated  
948 from a forest soil. *International Journal of Systematic and Evolutionary Microbiology*. 56:453–  
949 457. doi: 10.1099/ijs.0.63968-0.
- 950 Yang Z. 2007. PAML 4: phylogenetic analysis by maximum likelihood. *Mol. Biol. Evol.*  
951 24:1586–1591. doi: 10.1093/molbev/msm088.
- 952 Zhang C, Rabiee M, Sayyari E, Mirarab S. 2018. ASTRAL-III: polynomial time species tree  
953 reconstruction from partially resolved gene trees. *BMC Bioinformatics*. 19:153. doi:  
954 10.1186/s12859-018-2129-y.
- 955
- 956
